# Supplementary material for: A comparison of transcriptomic patterns measured in the skin of Chinese fine and coarse wool sheep breeds
Source: PubMed Central journal article supplement (PMC5662721; doi:10.1038/s41598-017-14772-4), 2017-10-30
Supplement: 41598_2017_14772_MOESM1_ESM.pdf [file 41598_2017_14772_MOESM1_ESM.pdf]

## Supplementary Information

A comparison of transcriptomic patterns measured in the skin of Chinese fine and coarse wool sheep breeds

Lichun Zhang<sup>1,2</sup>, Fuliang Sun<sup>3</sup>, Haiguo Jin<sup>1</sup>, Brian P. Dalrymple<sup>4</sup>, Yang Cao<sup>1</sup>, Tian Wei<sup>1</sup>, Tony Vuocolo<sup>2</sup>, Mingxin Zhang<sup>1</sup>, Qinlin Piao<sup>1</sup>, Aaron Ingham<sup>2\*</sup>

<sup>1</sup> Branch of husbandry, Jilin academy of agricultural science (JAAS), 186 Dong Xinghua st, 136100 Gongzhuling, Jilin, China;

<sup>2</sup> CSIRO Agriculture, Queensland Bioscience Precinct, 306 Carmody Rd, 4067 Queensland, Australia;

<sup>3</sup> Department of Veterinary Medicine, College of Agriculture, Yanbian University, Yanji 133002, China.

<sup>4</sup> UWA Institute of Agriculture, The University of Western Australia, Crawley, Perth, Western Australia 6009.

Corresponding author:

Aaron Ingham, [aaron.ingham@csiro.au](mailto:aaron.ingham@csiro.au)

## Supplementary Figures

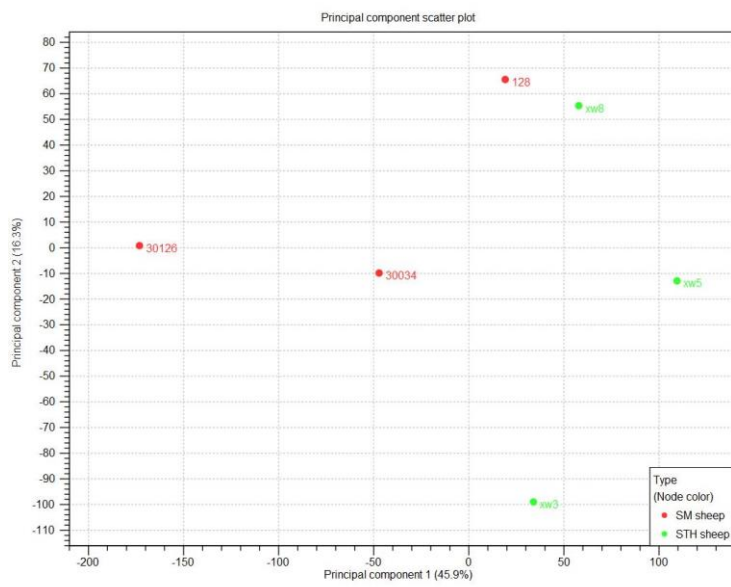

Figure S1. Principal component analysis (PCA) of RNA-seq.

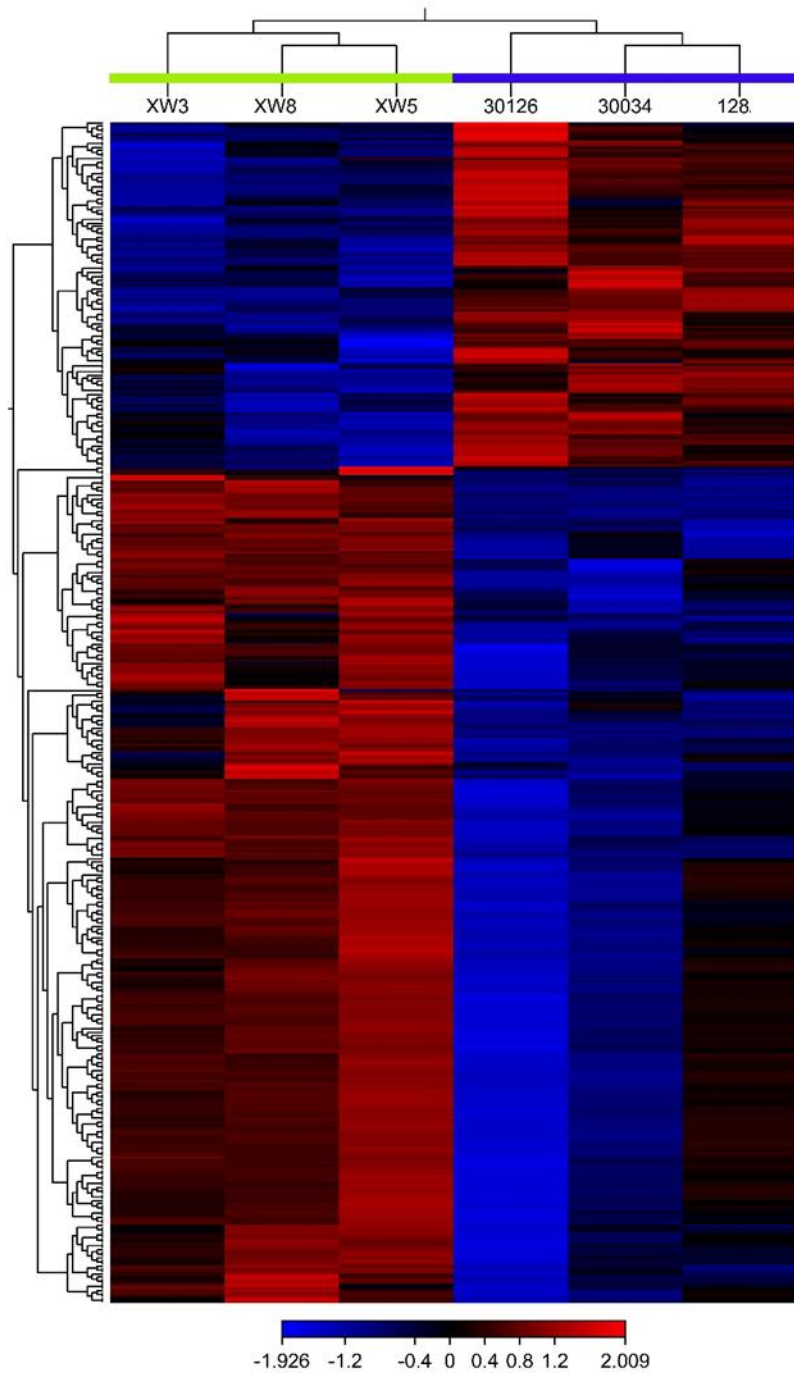

Figure S2. Heat map of differential expression genes (DEGs).

## Supplementary tables

Table S1: statistic of reads mapping

|                                          | Super Merino sheep(SM) |            |            | Small Tail Han sheep(STH) |            |            |            |
|------------------------------------------|------------------------|------------|------------|---------------------------|------------|------------|------------|
|                                          | 30034                  | 128        | 30126      | XW3                       | XW5        | XW8        |            |
| All reads                                | 65,096,892             | 45,630,916 | 57,271,982 | 45,511,562                | 64,656,682 | 46,058,870 |            |
| Reads Mapped in pairs                    | 59,720,786             | 41,806,006 | 52,178,312 | 41,592,552                | 59,458,486 | 42,105,938 |            |
| Rate of reads Mapped in pairs (%)        | 91.74                  | 91.62      | 91.11      | 91.39                     | 91.96      | 91.42      |            |
| Reads mapped in broken pairs             | 3,188,098              | 2,297,024  | 2,960,971  | 2,443,128                 | 3,220,482  | 2,481,568  |            |
| Rate of reads mapped in broken pairs (%) | 4.9                    | 5.03       | 5.17       | 5.37                      | 4.98       | 5.39       |            |
| Un Mapped reads                          | 2,188,008              | 1,527,886  | 2,132,699  | 1,475,882                 | 1,977,714  | 1,471,364  |            |
| Rate of un Mapped reads (%)              | 3.36                   | 3.35       | 3.72       | 3.24                      | 3.06       | 3.19       |            |
| Counted fragments                        | 62,908,884             | 44,103,030 | 55,139,283 | 44,035,680                | 62,678,968 | 44,587,506 |            |
| unique fragments                         | Exon                   | 19,688,226 | 13,140,754 | 18,234,734                | 13,856,288 | 18,729,808 | 13,758,250 |
|                                          | Exon-exon              | 21,473,634 | 13,614,794 | 21,131,829                | 14,565,841 | 19,848,431 | 13,570,958 |
|                                          | Intron                 | 9,499,186  | 8,625,477  | 5,562,372                 | 6,926,141  | 11,741,440 | 8,360,456  |
|                                          | Intergenic             | 6,162,754  | 4,735,410  | 5,038,200                 | 4,365,490  | 6,111,983  | 4,793,455  |
|                                          | Total                  | 56,823,800 | 40,116,435 | 49,967,135                | 39,713,760 | 56,431,662 | 40,483,119 |
| Unique mapping rate (%)                  | 87.29                  | 87.92      | 87.25      | 87.26                     | 87.28      | 87.89      |            |
| Non-specifically                         | 6,085,084              | 3,986,595  | 5,172,148  | 4,321,920                 | 6,247,306  | 4,104,387  |            |
| Uncounted fragments                      | 2,188,008              | 1,527,886  | 2,132,699  | 1,475,882                 | 1,977,714  | 1,471,364  |            |

Table S2: The DEGs list between SM and STH sheep

| Name         | Chromosome | Region                           | Identifier                | Log <sub>2</sub> fold change | Fold change | P-value  | FDR p-value | 30034 - RPKM | 128 - RPKM | 30126 - RPKM | XW8 - RPKM | XW3 - RPKM | XW5 - RPKM |
|--------------|------------|----------------------------------|---------------------------|------------------------------|-------------|----------|-------------|--------------|------------|--------------|------------|------------|------------|
| RPTN         | NC_019458  | complement(100922011..100928773) | <a href="#">105613036</a> | -3.40764                     | -10.6121    | 0        | 0           | 1.773849     | 1.807308   | 1.891288     | 19.88783   | 10.12132   | 26.11188   |
| DGAT2L6      | NC_019484  | 59620107..59646677               | <a href="#">101122168</a> | 2.384485                     | 5.221573    | 0        | 0           | 3.022        | 4.521074   | 6.228749     | 0.768679   | 0.774258   | 1.013876   |
| PLN          | NC_019465  | complement(19451607..19465519)   | <a href="#">101102067</a> | -3.32095                     | -9.99321    | 8.77E-15 | 8.3E-11     | 0.221624     | 0.853542   | 0.18964      | 2.704783   | 4.08427    | 5.583176   |
| SPINK9       | NC_019462  | 57172889..57181578               | <a href="#">101109177</a> | -4.84958                     | -28.8316    | 4.91E-14 | 3.48E-10    | 0.039666     | 0.141448   | 0.045255     | 0.559646   | 3.824948   | 2.020415   |
| MX1          | NC_019458  | 259561625..259596486             | <a href="#">443146</a>    | 2.479967                     | 5.578846    | 7.12E-14 | 4.04E-10    | 26.74101     | 9.064094   | 10.8042      | 3.301182   | 3.109782   | 1.681123   |
| FABP4        | NC_019466  | complement(57396171..57400688)   | <a href="#">100137067</a> | -1.83862                     | -3.57667    | 1.13E-12 | 5.33E-09    | 112.6266     | 47.73511   | 52.90771     | 217.4767   | 235.0566   | 284.4986   |
| HNF4A        | NC_019470  | 72275071..72305782               | <a href="#">100534656</a> | 4.051835                     | 16.58532    | 2.03E-12 | 8.24E-09    | 1.396821     | 1.316815   | 0.192752     | 0.042566   | 0.086198   | 0.042391   |
| LOC101113331 | NC_019462  | complement(65941708..65952658)   | <a href="#">101113331</a> | -4.28682                     | -19.5191    | 4.82E-12 | 1.71E-08    | 0.023532     | 0.041958   | 0.026848     | 0.431623   | 0.571503   | 0.720365   |
| PLIN4        | NC_019462  | 17131002..17139777               | <a href="#">101114356</a> | 1.778589                     | 3.430904    | 1.75E-11 | 5.51E-08    | 28.70705     | 38.42604   | 68.45874     | 12.75663   | 13.36526   | 12.29618   |
| SFRP2        | NC_019474  | 3727931..3735374                 | <a href="#">100302355</a> | -2.4773                      | -5.56854    | 3.85E-11 | 1.09E-07    | 1.149542     | 0.717375   | 1.741865     | 6.614303   | 6.56889    | 6.543973   |
| LOC105613042 | NC_019458  | complement(100998306..101006564) | <a href="#">105613042</a> | -2.23483                     | -4.70707    | 4.64E-11 | 1.2E-07     | 23.70618     | 37.58135   | 12.39749     | 102.1398   | 78.09701   | 157.4662   |
| TFF2         | NC_019458  | complement(260517767..260521339) | <a href="#">101104197</a> | -3.51961                     | -11.4685    | 2.54E-10 | 6E-07       | 0.193854     | 0.138257   | 0.387046     | 2.222268   | 4.119442   | 1.945648   |
| SEMA3C       | NC_019461  | 39918288..40126744               | <a href="#">101114604</a> | -1.42382                     | -2.68296    | 3.23E-10 | 7.05E-07    | 4.507295     | 6.786673   | 3.771591     | 12.73689   | 11.08365   | 15.52547   |
| IFI6         | NC_019459  | 238530640..238534368             | <a href="#">101106828</a> | 2.086878                     | 4.248277    | 5.18E-10 | 9.8E-07     | 107.4246     | 39.94699   | 58.05795     | 19.05649   | 20.68386   | 7.215009   |
| LOC101116537 | NC_019484  | 2851201..2857115                 | <a href="#">101116537</a> | -2.51253                     | -5.7062     | 4.95E-10 | 9.8E-07     | 2.203476     | 0.953962   | 0.409624     | 7.399786   | 4.113341   | 8.125537   |
| LOC101123419 | NC_019477  | 26398840..26406039               | <a href="#">101123419</a> | 1.555398                     | 2.939149    | 7.38E-10 | 1.31E-06    | 20.77898     | 16.03478   | 10.22023     | 4.460779   | 6.894209   | 4.253015   |
| NEXN         | NC_019458  | 53628803..53681695               | <a href="#">101122738</a> | -1.66239                     | -3.16541    | 1.13E-09 | 1.89E-06    | 3.753157     | 5.16282    | 2.184588     | 9.122034   | 12.05364   | 13.10756   |
| DES          | NC_019459  | 220321994..220328992             | <a href="#">101117308</a> | -1.31222                     | -2.48324    | 1.32E-09 | 2.08E-06    | 25.07939     | 17.53844   | 24.13961     | 38.27432   | 66.86671   | 55.98275   |
| MX2          | NC_019458  | 259515453..259554045             | <a href="#">780441</a>    | 3.380272                     | 10.4127     | 1.77E-09 | 2.64E-06    | 1.904283     | 0.710102   | 0.69265      | 0.239839   | 0.037583   | 0.028435   |
| GPA33        | NC_019458  | complement(117076246..117128021) | <a href="#">101110729</a> | 4.206692                     | 18.46462    | 2.15E-09 | 3.05E-06    | 0.224571     | 0.770524   | 0.941764     | 0.034254   | 0          | 0.060918   |
| ISG15        | NC_019469  | complement(49466564..49467619)   | <a href="#">443057</a>    | 3.023443                     | 8.131058    | 3.94E-09 | 5.33E-06    | 17.30319     | 4.832202   | 4.935341     | 0.808872   | 1.861382   | 0.575402   |
| LOC101123672 | NC_019477  | complement(26412306..26427047)   | <a href="#">101123672</a> | 1.448603                     | 2.729437    | 5.25E-09 | 6.78E-06    | 40.17686     | 32.67987   | 21.91151     | 9.706301   | 14.97312   | 9.191553   |
| DHCR24       | NC_019458  | complement(28996772..29028117)   | <a href="#">101123162</a> | 1.171305                     | 2.252153    | 6.03E-09 | 7.45E-06    | 146.5548     | 121.4866   | 195.1464     | 67.01196   | 63.16596   | 69.16908   |
| LOC101110417 | NC_019464  | complement(83735106..83750552)   | <a href="#">101110417</a> | 1.356416                     | 2.560482    | 7.51E-09 | 8.89E-06    | 12.87038     | 13.40198   | 24.07558     | 6.629882   | 5.153734   | 7.253724   |
| LOC101120001 | NC_019469  | 4466942..4474363                 | <a href="#">101120001</a> | -1.16416                     | -2.24103    | 8.84E-09 | 1E-05       | 24.82235     | 21.93606   | 22.26859     | 43.87454   | 52.71782   | 53.70583   |
| LOC105607568 | NC_019471  | 44478045..44480837               | <a href="#">105607568</a> | -13.5144                     | -11701.3    | 9.63E-09 | 1.05E-05    | 0            | 0          | 0            | 30.13397   | 2.397768   | 4.000862   |
| NNAT         | NC_019470  | 65917335..65920258               | <a href="#">101122618</a> | 1.500463                     | 2.829335    | 1.35E-08 | 1.42E-05    | 19.81333     | 10.00754   | 16.21021     | 5.136003   | 4.282653   | 6.270476   |
| LOC105616741 | NC_019470  | 66764519..66792369               | <a href="#">105616741</a> | -3.13764                     | -8.80084    | 1.5E-08  | 1.52E-05    | 0.20289      | 0.339735   | 0.412637     | 6.353716   | 0.579693   | 1.212953   |
| COL6A5       | NC_019458  | complement(269653942..269821417) | <a href="#">101118494</a> | -2.9969                      | -7.98281    | 1.58E-08 | 1.55E-05    | 0.60629      | 0.242246   | 0.170508     | 3.543881   | 0.332384   | 3.91358    |
| TCHHL1       | NC_019458  | complement(100854244..100861502) | <a href="#">101120712</a> | -1.71613                     | -3.28553    | 1.67E-08 | 1.58E-05    | 15.06256     | 14.21067   | 9.190952     | 67.4099    | 24.74404   | 30.36937   |
| LOC101112509 | NC_019472  | complement(22032357..22044601)   | <a href="#">101112509</a> | -1.2022                      | -2.30091    | 1.81E-08 | 1.65E-05    | 49.19284     | 48.32623   | 40.46722     | 114.5762   | 79.9049    | 113.4139   |
| LOC101123159 | NC_019477  | complement(26374549..26385517)   | <a href="#">101123159</a> | 1.494389                     | 2.817448    | 1.88E-08 | 1.67E-05    | 9.229788     | 8.100781   | 5.785552     | 2.184698   | 3.769216   | 2.065891   |
| SENP6        | NC_019465  | 2325109..2462063                 | <a href="#">101118793</a> | -1.41844                     | -2.67297    | 2.93E-08 | 2.52E-05    | 5.519306     | 8.696814   | 4.189049     | 16.0735    | 13.31781   | 18.55251   |
| LOC101107056 | NC_019479  | 15694398..15743953               | <a href="#">101107056</a> | 2.971038                     | 7.841001    | 3.83E-08 | 3.2E-05     | 0.924384     | 0.590516   | 0.349389     | 0.064011   | 0.105321   | 0.062611   |
| OAS1         | NC_019474  | complement(61037615..61063301)   | <a href="#">105602911</a> | 1.853153                     | 3.612888    | 5.12E-08 | 4.16E-05    | 25.31294     | 9.981787   | 8.151179     | 5.036113   | 4.148656   | 2.461911   |
| CYP2J        | NC_019458  | complement(34592121..34659854)   | <a href="#">768095</a>    | 1.06774                      | 2.096148    | 5.28E-08 | 4.16E-05    | 28.86155     | 31.03424   | 30.95961     | 15.04692   | 12.09288   | 14.9011    |
| CLEC4F       | NC_019460  | complement(92668650..92679885)   | <a href="#">101102383</a> | 3.306366                     | 9.892711    | 6.24E-08 | 4.79E-05    | 1.806571     | 0.505022   | 0.673234     | 0.038426   | 0.181567   | 0.072892   |
| ZNF175       | NC_019471  | 56371604..56378089               | <a href="#">101123658</a> | -1.51864                     | -2.8652     | 7.78E-08 | 5.81E-05    | 1.895233     | 2.92618    | 1.53261      | 5.186385   | 5.348074   | 7.169774   |

|              |           |                                  |                           |          |          |          |          |          |          |          |          |          |          |
|--------------|-----------|----------------------------------|---------------------------|----------|----------|----------|----------|----------|----------|----------|----------|----------|----------|
| LOC101119041 | NC_019462 | complement(7356284..7381259)     | <a href="#">101119041</a> | 1.256835 | 2.38971  | 1.24E-07 | 8.65E-05 | 55.7409  | 44.67696 | 91.5842  | 26.86717 | 22.51152 | 28.36037 |
| CES4A        | NC_019471 | 33926704..33941237               | <a href="#">101109991</a> | 1.286999 | 2.4402   | 1.19E-07 | 8.65E-05 | 86.13325 | 90.27051 | 153.1702 | 39.44071 | 34.1202  | 57.12631 |
| LOC105602976 | NC_019474 | 70405502..70413078               | <a href="#">105602976</a> | -7.61157 | -195.574 | 1.25E-07 | 8.65E-05 | 0        | 0        | 0.014235 | 2.394177 | 0.03565  | 1.365008 |
| OAS2         | NC_019474 | complement(61002833..61035319)   | <a href="#">101109915</a> | 2.58478  | 5.999239 | 1.31E-07 | 8.84E-05 | 1.414001 | 0.406888 | 0.286955 | 0.121173 | 0.16651  | 0.053874 |
| LRAT         | NC_019474 | complement(2473350..2480205)     | <a href="#">101123410</a> | 1.154964 | 2.226788 | 1.49E-07 | 9.85E-05 | 18.91705 | 26.07835 | 33.56517 | 8.645095 | 13.02191 | 12.68456 |
| SDS          | NC_019474 | 60681920..60689944               | <a href="#">101112348</a> | 1.546275 | 2.92062  | 1.6E-07  | 0.000104 | 5.805498 | 7.450087 | 5.046509 | 1.727359 | 1.749005 | 2.576473 |
| GCNT1        | NC_019459 | complement(59816036..59859869)   | <a href="#">101121316</a> | -1.29418 | -2.45238 | 2.3E-07  | 0.000143 | 0.966528 | 0.581535 | 0.651195 | 1.711618 | 1.696133 | 1.836353 |
| KMO          | NC_019469 | complement(33248795..33317791)   | <a href="#">101121026</a> | -2.1719  | -4.50617 | 2.31E-07 | 0.000143 | 0.136315 | 0.539672 | 0.199958 | 1.538625 | 1.21612  | 1.105689 |
| CCL26        | NC_019481 | complement(33931038..33935665)   | <a href="#">101117297</a> | -1.54923 | -2.92661 | 2.87E-07 | 0.000174 | 20.68752 | 6.964212 | 10.98517 | 43.7983  | 28.22387 | 37.01401 |
| KERA         | NC_019460 | complement(127180428..127187605) | <a href="#">101112715</a> | -1.85772 | -3.62434 | 2.95E-07 | 0.000175 | 5.462605 | 12.08872 | 3.186306 | 36.55361 | 20.32506 | 16.75644 |
| LOC101116409 | NC_019465 | complement(52736262..52744363)   | <a href="#">101116409</a> | -2.38739 | -5.23209 | 3.28E-07 | 0.00019  | 6.020022 | 67.16197 | 22.3257  | 117.82   | 196.1543 | 179.8678 |
| PCTP         | NC_019468 | 5774689..5803850                 | <a href="#">101119229</a> | 1.302729 | 2.46695  | 3.74E-07 | 0.000213 | 18.95526 | 15.66719 | 33.8347  | 8.661184 | 10.67576 | 7.628854 |
| LOC101113339 | NC_019466 | complement(57381426..57384616)   | <a href="#">101113339</a> | -1.11774 | -2.17007 | 4.8E-07  | 0.000267 | 371.6341 | 387.0912 | 309.3177 | 868.6378 | 663.0838 | 720.6032 |
| IL33         | NC_019459 | 73691112..73822328               | <a href="#">101116705</a> | -1.09598 | -2.13758 | 5.81E-07 | 0.000317 | 3.869642 | 4.435994 | 2.80992  | 6.449173 | 8.58142  | 8.111227 |
| LOC105613724 | NC_019458 | 105983948..106017666             | <a href="#">105613724</a> | -1.8865  | -3.69736 | 6.05E-07 | 0.000324 | 0.26059  | 0.55193  | 0.486507 | 1.983184 | 1.004018 | 1.664385 |
| RSAD2        | NC_019460 | 16520599..16539212               | <a href="#">101115013</a> | 2.112457 | 4.324271 | 6.56E-07 | 0.000345 | 5.279762 | 2.177746 | 0.959913 | 0.680237 | 0.648246 | 0.555056 |
| CHORDC1      | NC_019478 | 4577548..4601641                 | <a href="#">101108786</a> | -1.09592 | -2.13749 | 6.91E-07 | 0.000357 | 7.648893 | 9.798166 | 6.118868 | 13.57174 | 14.15424 | 21.24753 |
| MYH11        | NC_019481 | complement(14090323..14217839)   | <a href="#">101114409</a> | -1.04813 | -2.06784 | 7.13E-07 | 0.000361 | 33.76173 | 33.19641 | 35.94244 | 65.61665 | 74.52719 | 66.82163 |
| LOC101107809 | NC_019470 | 42366937..42380338               | <a href="#">101107809</a> | -3.65297 | -12.5793 | 7.59E-07 | 0.000378 | 0.031108 | 0.11093  | 0        | 0.241395 | 0.63327  | 0.858598 |
| FGL2         | NC_019461 | 43979053..43982996               | <a href="#">101118266</a> | -1.13964 | -2.20327 | 7.76E-07 | 0.00038  | 13.92572 | 16.01054 | 10.42585 | 32.27692 | 21.11682 | 32.91081 |
| ADGRV1       | NC_019462 | 87395891..87938369               | <a href="#">101120749</a> | 1.406548 | 2.651021 | 8.38E-07 | 0.000403 | 0.550228 | 0.542825 | 0.428646 | 0.226854 | 0.146591 | 0.183271 |
| LOC101112356 | NC_019477 | 30658712..30661101               | <a href="#">101112356</a> | -2.4125  | -5.32398 | 9.79E-07 | 0.000463 | 0.172927 | 0.151794 | 0.182118 | 0.938402 | 0.494084 | 1.181554 |
| MCTP1        | NC_019462 | complement(91302996..91859584)   | <a href="#">101122523</a> | -1.43423 | -2.70237 | 1.13E-06 | 0.000527 | 1.207007 | 1.153128 | 0.550834 | 2.562386 | 1.97695  | 3.090567 |
| CENPE        | NC_019463 | 21713052..21791689               | <a href="#">101105752</a> | -1.66488 | -3.17087 | 1.16E-06 | 0.000529 | 0.947579 | 1.853216 | 0.730588 | 2.778343 | 2.38484  | 5.732334 |
| TMC5         | NC_019481 | 16969807..17042743               | <a href="#">101116951</a> | -4.34327 | -20.298  | 1.3E-06  | 0.000584 | 0.013448 | 0        | 0        | 0.094872 | 0.076849 | 0.143976 |
| NPHS2        | NC_019469 | complement(58781179..58802250)   | <a href="#">101121618</a> | 4.287783 | 19.53221 | 1.53E-06 | 0.000679 | 8.785945 | 2.508834 | 1.173722 | 0        | 0.628168 | 0        |
| LOC105605703 | NC_019458 | 122945583..122945870             | <a href="#">105605703</a> | 2.828772 | 7.104692 | 1.56E-06 | 0.000682 | 7.78242  | 2.834272 | 13.66489 | 0.934492 | 1.971255 | 0.443175 |
| LOC105601854 | NC_019459 | complement(116421326..116421901) | <a href="#">105601854</a> | 1.113541 | 2.16376  | 1.71E-06 | 0.000735 | 79.45243 | 56.64608 | 104.6592 | 40.29997 | 41.98773 | 25.87036 |
| PVRL3        | NC_019458 | 174143229..174253856             | <a href="#">101113983</a> | -1.13911 | -2.20246 | 1.89E-06 | 0.000791 | 0.696895 | 0.874446 | 0.567555 | 1.627567 | 1.256207 | 1.688919 |
| BST-2B       | NC_019462 | 5430867..5435031                 | <a href="#">100422801</a> | 1.793327 | 3.466133 | 1.89E-06 | 0.000791 | 7.851371 | 2.334613 | 2.990493 | 0.962896 | 1.742853 | 0.981991 |
| LOC105607776 | NC_019476 | complement(51558740..51561200)   | <a href="#">105607776</a> | 2.287718 | 4.88283  | 1.96E-06 | 0.000807 | 2.216635 | 7.406465 | 3.845432 | 1.392366 | 0.78082  | 0.533334 |
| PGM5         | NC_019459 | complement(67752119..67958848)   | <a href="#">101108630</a> | -0.94128 | -1.92023 | 2.16E-06 | 0.000876 | 7.860277 | 6.650842 | 7.671722 | 13.81315 | 15.01391 | 12.70094 |
| PTX3         | NC_019458 | complement(228078905..228085039) | <a href="#">100034672</a> | 2.290341 | 4.891716 | 2.2E-06  | 0.000881 | 0.888701 | 1.315485 | 0.784358 | 0.23658  | 0.167681 | 0.185124 |
| LOC101111778 | NC_019460 | 133573147..133578596             | <a href="#">101111178</a> | -1.35227 | -2.55313 | 2.36E-06 | 0.000931 | 30.30503 | 20.08512 | 26.714   | 93.56247 | 34.65669 | 61.70824 |
| ESF1         | NC_019470 | complement(6775444..6835749)     | <a href="#">101110781</a> | -1.21431 | -2.3203  | 2.59E-06 | 0.001006 | 3.482204 | 5.366001 | 2.786864 | 8.260799 | 6.979145 | 11.0183  |
| BPIFB6       | NC_019470 | 61537596..61559606               | <a href="#">101106867</a> | -2.4222  | -5.35986 | 2.82E-06 | 0.001068 | 0.030435 | 0.040859 | 0.030638 | 0.212179 | 0.22251  | 0.100624 |
| LOC101117112 | NC_019475 | complement(57521275..57527081)   | <a href="#">101117112</a> | 1.292797 | 2.450026 | 2.82E-06 | 0.001068 | 43.26941 | 22.80494 | 32.96674 | 11.51139 | 18.30853 | 9.532105 |
| KRT10        | NC_019468 | complement(40533235..40538366)   | <a href="#">101106346</a> | -1.33607 | -2.52462 | 3.13E-06 | 0.001159 | 177.8067 | 143.9524 | 147.0425 | 498.6998 | 219.2858 | 425.5681 |
| PLCB4        | NC_019470 | 1483676..1963005                 | <a href="#">101106864</a> | -1.42679 | -2.68848 | 3.14E-06 | 0.001159 | 0.639903 | 0.722604 | 0.314336 | 0.917176 | 1.735813 | 1.744525 |
| POSTN        | NC_019467 | 24453914..24488210               | <a href="#">101103329</a> | -1.63148 | -3.09831 | 3.23E-06 | 0.001176 | 126.7975 | 150.354  | 46.09436 | 389.9484 | 214.9    | 368.6576 |
| LOC101108071 | NC_019470 | 42564859..42586431               | <a href="#">101108071</a> | -4.27834 | -19.4047 | 3.52E-06 | 0.001265 | 0.078075 | 0.022273 | 0.017815 | 0.110156 | 1.383054 | 0.940333 |
| IVL          | NC_019458 | 101659350..101662511             | <a href="#">101123427</a> | -1.0481  | -2.0678  | 4.1E-06  | 0.001401 | 116.0902 | 85.56294 | 105.6915 | 258.9367 | 187.1719 | 170.0984 |

|              |           |                                  |                           |          |          |          |          |          |          |          |          |          |          |
|--------------|-----------|----------------------------------|---------------------------|----------|----------|----------|----------|----------|----------|----------|----------|----------|----------|
| LOC101103522 | NC_019458 | complement(178432198..178434922) | <a href="#">101103522</a> | -5.25334 | -38.1428 | 3.97E-06 | 0.001401 | 0.035    | 0.016642 | 0.053243 | 0        | 0.016667 | 3.893438 |
| TSKS         | NC_019471 | complement(55030780..55046115)   | <a href="#">101108334</a> | 1.457623 | 2.746554 | 4.05E-06 | 0.001401 | 3.922507 | 4.381546 | 5.026962 | 2.059568 | 1.368928 | 1.30331  |
| TMEM86A      | NC_019478 | complement(25344460..25348867)   | <a href="#">101121641</a> | 0.948013 | 1.929214 | 4.03E-06 | 0.001401 | 22.14461 | 21.01594 | 29.69994 | 13.18445 | 9.445685 | 13.92863 |
| FAM167A      | NC_019459 | complement(104095166..104126657) | <a href="#">101118417</a> | 0.898245 | 1.863798 | 4.68E-06 | 0.001545 | 14.77011 | 14.21379 | 16.87783 | 9.432944 | 8.050493 | 6.451042 |
| CPM          | NC_019460 | 150605403..150681068             | <a href="#">101104474</a> | -0.92644 | -1.90058 | 4.68E-06 | 0.001545 | 9.224024 | 9.079279 | 7.629199 | 18.74792 | 12.47704 | 16.58152 |
| CERS4        | NC_019462 | 14521946..14550042               | <a href="#">101102559</a> | 0.909402 | 1.878267 | 4.62E-06 | 0.001545 | 28.6837  | 28.43023 | 42.26005 | 16.3496  | 16.64213 | 18.34199 |
| IL1F10       | NC_019460 | complement(59638718..59653603)   | <a href="#">101111084</a> | 1.454229 | 2.740102 | 5.23E-06 | 0.001608 | 34.79744 | 22.49132 | 47.01356 | 8.561152 | 20.71471 | 7.891382 |
| LARP7        | NC_019463 | complement(13069416..13088065)   | <a href="#">101116230</a> | -1.00472 | -2.00655 | 5.27E-06 | 0.001608 | 9.338631 | 12.42988 | 7.514506 | 16.80293 | 17.75005 | 22.61592 |
| TNFRSF11B    | NC_019466 | 57987419..58016909               | <a href="#">100037695</a> | -3.01786 | -8.09968 | 5.1E-06  | 0.001608 | 0.259527 | 0.154246 | 0.01645  | 1.485016 | 0.288366 | 1.606285 |
| P2RX1        | NC_019468 | complement(24096822..24115485)   | <a href="#">101101902</a> | -2.58026 | -5.98049 | 5.21E-06 | 0.001608 | 1.051389 | 0.249952 | 0.192783 | 5.73057  | 1.046038 | 1.821556 |
| LOC101110259 | NC_019470 | 73287609..73297034               | <a href="#">101110259</a> | -3.30629 | -9.89222 | 5.23E-06 | 0.001608 | 0.471198 | 0.059305 | 0.221362 | 5.474966 | 0.316776 | 1.41878  |
| LOC106991784 | NC_019476 | complement(51549903..51552443)   | <a href="#">106991784</a> | 2.096956 | 4.278057 | 5.26E-06 | 0.001608 | 1.604952 | 4.419375 | 3.359678 | 0.984539 | 0.657939 | 0.504263 |
| GDPD2        | NC_019484 | 59864265..59875338               | <a href="#">101101866</a> | -2.7413  | -6.68673 | 5.16E-06 | 0.001608 | 0.02988  | 0.074586 | 0.03409  | 0.474272 | 0.160072 | 0.254909 |
| BCL6B        | NC_019468 | 26398439..26404455               | <a href="#">101114452</a> | 1.264749 | 2.402854 | 5.63E-06 | 0.001699 | 3.007352 | 2.618981 | 2.533349 | 1.135747 | 1.317954 | 0.880551 |
| PPIG         | NC_019459 | complement(138770216..138812976) | <a href="#">101119793</a> | -1.26527 | -2.40372 | 6.96E-06 | 0.002059 | 5.114008 | 9.752035 | 4.367287 | 13.82083 | 11.55771 | 19.6916  |
| CAPN8        | NC_019469 | complement(25003871..25079467)   | <a href="#">101103336</a> | -1.8655  | -3.64393 | 6.95E-06 | 0.002059 | 0.569676 | 1.008394 | 0.814392 | 4.841927 | 1.529612 | 2.094176 |
| PI3          | NC_019470 | 72941426..72942784               | <a href="#">641305</a>    | -2.75731 | -6.76133 | 7.44E-06 | 0.002178 | 0.131644 | 1.690001 | 0.525678 | 7.847411 | 3.338155 | 4.294122 |
| RDH12        | NC_019464 | 76426876..76435627               | <a href="#">101115797</a> | 1.122263 | 2.176881 | 7.8E-06  | 0.002261 | 24.4501  | 23.77784 | 50.09194 | 15.36832 | 13.46074 | 14.93614 |
| LOC101109643 | NC_019472 | 45647819..45655928               | <a href="#">101109643</a> | -1.01435 | -2.02    | 8.37E-06 | 0.002401 | 3.51045  | 3.25155  | 2.891456 | 4.386005 | 8.557123 | 6.080738 |
| FOXI3        | NC_019460 | complement(58843200..58851081)   | <a href="#">101104229</a> | 1.353997 | 2.556193 | 9.29E-06 | 0.002629 | 3.052808 | 1.766536 | 3.017803 | 0.934792 | 1.048437 | 0.992349 |
| LOC101110181 | NC_019474 | complement(61047492..61056487)   | <a href="#">101110181</a> | 2.234179 | 4.704947 | 9.35E-06 | 0.002629 | 1.770172 | 0.872084 | 0.778643 | 0.32097  | 0.264056 | 0.128434 |
| AADACL3      | NC_019469 | complement(52733414..52891787)   | <a href="#">101112496</a> | 1.193837 | 2.287603 | 9.99E-06 | 0.00278  | 1.29441  | 1.41037  | 2.054886 | 0.700417 | 0.668166 | 0.652667 |
| RG55         | NC_019458 | complement(112746865..112800739) | <a href="#">101110554</a> | -1.45455 | -2.74071 | 1.02E-05 | 0.002801 | 12.85559 | 14.70454 | 4.627835 | 25.60727 | 20.30716 | 39.7709  |
| PAQR7        | NC_019459 | 240106357..240108379             | <a href="#">101117571</a> | 1.184486 | 2.272823 | 1.03E-05 | 0.002812 | 25.77306 | 42.23248 | 36.87243 | 19.85576 | 8.722087 | 16.20668 |
| LOC101116281 | NC_019484 | 2824422..2831706                 | <a href="#">101116281</a> | -1.86728 | -3.64844 | 1.04E-05 | 0.002823 | 1.76192  | 1.657065 | 2.25318  | 11.9105  | 3.48516  | 4.663868 |
| COL8A2       | NC_019458 | complement(10756459..10761140)   | <a href="#">101117040</a> | 1.064565 | 2.091539 | 1.29E-05 | 0.003404 | 8.769399 | 8.809157 | 12.07806 | 3.32067  | 6.704392 | 3.822043 |
| GPR155       | NC_019459 | 134459450..134498177             | <a href="#">101110651</a> | -1.13309 | -2.19328 | 1.31E-05 | 0.003404 | 2.34285  | 2.432956 | 1.260473 | 4.249012 | 3.468111 | 5.135728 |
| LOC654331    | NC_019460 | complement(49916954..49919879)   | <a href="#">654331</a>    | -2.128   | -4.3711  | 1.3E-05  | 0.003404 | 3.068345 | 1.468315 | 1.084088 | 4.943614 | 3.167362 | 15.49734 |
| LOC101117799 | NC_019478 | 25460719..25461583               | <a href="#">101117799</a> | 1.74697  | 3.356529 | 1.29E-05 | 0.003404 | 6.211387 | 3.722235 | 8.847799 | 1.840895 | 2.520289 | 1.106658 |
| CSF3R        | NC_019458 | complement(11044427..11059493)   | <a href="#">101118070</a> | 1.81344  | 3.514793 | 1.33E-05 | 0.003432 | 0.892703 | 1.111185 | 0.624547 | 0.201999 | 0.228592 | 0.287389 |
| PCSK1N       | NC_019484 | 52967697..52972144               | <a href="#">101113828</a> | 1.1848   | 2.273318 | 1.37E-05 | 0.003494 | 8.576047 | 11.92402 | 15.31914 | 5.051859 | 5.940192 | 4.376206 |
| ROCK1        | NC_019480 | 35256061..35381753               | <a href="#">101102442</a> | -1.04666 | -2.06574 | 1.39E-05 | 0.003529 | 7.728266 | 11.93547 | 5.956982 | 15.55432 | 15.63151 | 20.4128  |
| MFAP4        | NC_019468 | 33588943..33590925               | <a href="#">101109814</a> | 0.854742 | 1.808435 | 1.46E-05 | 0.003659 | 75.51056 | 77.69203 | 95.7666  | 40.25242 | 53.70373 | 40.16776 |
| ECI2         | NC_019477 | 48837889..48853850               | <a href="#">101121214</a> | 0.905422 | 1.873093 | 1.5E-05  | 0.003747 | 93.90281 | 92.56857 | 132.2056 | 61.29219 | 49.30864 | 54.43602 |
| LOC101110773 | NC_019467 | 29433047..29434884               | <a href="#">101110773</a> | 2.894352 | 7.435101 | 1.58E-05 | 0.003889 | 1.159367 | 0.452192 | 7.233689 | 0.498396 | 0.155274 | 0.481811 |
| STK32A       | NC_019462 | 55848984..55985398               | <a href="#">101114354</a> | -1.41925 | -2.67446 | 1.64E-05 | 0.004007 | 0.497719 | 0.462898 | 0.257925 | 1.450772 | 0.755312 | 0.957003 |
| TPM2         | NC_019459 | 52591784..52599233               | <a href="#">101114931</a> | -0.79725 | -1.73778 | 1.71E-05 | 0.004147 | 29.84709 | 27.64916 | 31.9405  | 48.86623 | 57.1061  | 45.35718 |
| FA2H         | NC_019471 | complement(1522608..1576330)     | <a href="#">101116673</a> | 0.995434 | 1.99368  | 1.74E-05 | 0.004181 | 95.40045 | 101.79   | 167.3321 | 60.152   | 50.96412 | 66.08419 |
| SLC45A4      | NC_019466 | 15459151..15527205               | <a href="#">101118622</a> | 0.891765 | 1.855445 | 1.95E-05 | 0.004648 | 3.927215 | 3.85453  | 4.347955 | 2.348399 | 2.163134 | 1.866934 |
| KRT79        | NC_019460 | 133267694..133278564             | <a href="#">101108641</a> | 0.983165 | 1.976798 | 2.13E-05 | 0.005041 | 302.3749 | 244.0721 | 326.5227 | 152.7934 | 117.6596 | 157.0788 |
| GSDMC        | NC_019466 | complement(23689942..23708037)   | <a href="#">101103902</a> | -2.69999 | -6.49795 | 2.18E-05 | 0.005116 | 0.171078 | 0.477886 | 0.105725 | 1.820374 | 0.224034 | 2.711518 |
| TMPRSS11F    | NC_019463 | complement(83611459..83709947)   | <a href="#">101121519</a> | -1.33403 | -2.52106 | 2.27E-05 | 0.00529  | 2.1998   | 2.39333  | 0.835258 | 5.35737  | 3.452867 | 4.4966   |

|              |           |                                  |                           |          |          |          |          |          |          |          |          |          |          |
|--------------|-----------|----------------------------------|---------------------------|----------|----------|----------|----------|----------|----------|----------|----------|----------|----------|
| ACTA1        | NC_019482 | complement(777575..780357)       | <a href="#">101107662</a> | -2.17756 | -4.52387 | 2.3E-05  | 0.005298 | 0.53432  | 0.249167 | 0.820629 | 0.884354 | 3.963408 | 2.258562 |
| CRYM         | NC_019481 | complement(19041179..19069773)   | <a href="#">101102280</a> | 1.591921 | 3.014504 | 2.33E-05 | 0.005339 | 7.47647  | 2.523976 | 3.826839 | 1.12482  | 1.708373 | 1.60031  |
| LOC105614079 | NC_019458 | complement(101088513..101101488) | <a href="#">105614079</a> | -1.2899  | -2.44511 | 2.43E-05 | 0.005495 | 42.66913 | 40.04631 | 18.69287 | 89.04661 | 49.61445 | 101.5196 |
| LOC101119933 | NC_019472 | complement(77699373..77708234)   | <a href="#">101119933</a> | -4.64013 | -24.9355 | 2.44E-05 | 0.005495 | 0.028285 | 0        | 0.016135 | 0.818096 | 0.323258 | 0.184525 |
| LOC101111233 | NC_019477 | 27710194..27713220               | <a href="#">101111233</a> | -3.16591 | -8.97499 | 2.46E-05 | 0.005495 | 0.064408 | 0.128622 | 0        | 0.972356 | 0.62569  | 0.11636  |
| KCND3        | NC_019458 | complement(88199539..88422824)   | <a href="#">101115919</a> | -1.27425 | -2.41873 | 2.63E-05 | 0.005621 | 0.3309   | 0.60425  | 0.366584 | 0.868333 | 0.954576 | 1.2354   |
| CEP83        | NC_019460 | complement(130261508..130408651) | <a href="#">101115779</a> | -1.23941 | -2.36102 | 2.59E-05 | 0.005621 | 1.60571  | 2.320045 | 1.18574  | 3.511906 | 3.422289 | 4.787859 |
| KTN1         | NC_019464 | 64891149..64996574               | <a href="#">101119479</a> | -1.11976 | -2.17311 | 2.61E-05 | 0.005621 | 19.77176 | 30.61884 | 13.32362 | 41.39489 | 37.35443 | 56.18354 |
| LRRCC1       | NC_019466 | complement(89825713..89871374)   | <a href="#">101118707</a> | -1.25369 | -2.38451 | 2.6E-05  | 0.005621 | 4.761941 | 8.720838 | 3.218326 | 11.66656 | 10.8961  | 16.29859 |
| SLC25A20     | NC_019476 | 51004174..51042203               | <a href="#">100147786</a> | 0.944859 | 1.925001 | 2.62E-05 | 0.005621 | 35.10807 | 33.56079 | 54.92813 | 21.56139 | 18.87392 | 21.80071 |
| GRIA3        | NC_019484 | 101413004..101724133             | <a href="#">443273</a>    | -1.51186 | -2.85178 | 2.63E-05 | 0.005621 | 0.466922 | 0.704332 | 0.212143 | 0.982346 | 1.174698 | 1.685841 |
| LOC101106588 | NC_019462 | complement(15020344..15066298)   | <a href="#">101106588</a> | -1.85875 | -3.62694 | 2.68E-05 | 0.005685 | 0.607297 | 0.23822  | 0.271374 | 0.978227 | 1.691777 | 1.29524  |
| SCEL         | NC_019467 | 53105195..53233117               | <a href="#">101103405</a> | -1.03428 | -2.04809 | 2.75E-05 | 0.005774 | 12.39983 | 13.32248 | 7.021615 | 23.30898 | 16.22574 | 25.57415 |
| SUMF2        | NC_019481 | 27710881..27722110               | <a href="#">101109064</a> | 0.949665 | 1.931424 | 2.77E-05 | 0.005791 | 10.53789 | 8.948005 | 13.46479 | 4.419919 | 6.26986  | 5.875857 |
| DTNA         | NC_019480 | complement(22384594..22694486)   | <a href="#">101111507</a> | -1.21137 | -2.31557 | 2.82E-05 | 0.005841 | 0.453394 | 0.462408 | 0.483658 | 1.052303 | 1.1335   | 0.973823 |
| PSMC6        | NC_019464 | complement(11227530..11252435)   | <a href="#">101116401</a> | -0.84581 | -1.79728 | 2.87E-05 | 0.005915 | 22.5631  | 27.87176 | 17.31896 | 37.14395 | 41.97388 | 39.58235 |
| SYNPO2       | NC_019463 | complement(6402800..6607232)     | <a href="#">101110330</a> | -0.8952  | -1.85986 | 3.07E-05 | 0.006218 | 6.209161 | 6.264974 | 3.854808 | 7.744031 | 11.31908 | 10.52893 |
| HSPH1        | NC_019467 | 30011966..30035540               | <a href="#">101110772</a> | -0.83916 | -1.789   | 3.06E-05 | 0.006218 | 18.00129 | 16.90966 | 13.31715 | 25.66153 | 25.81567 | 32.28331 |
| PTPRQ        | NC_019460 | 116114949..116419066             | <a href="#">101103961</a> | -2.81265 | -7.02575 | 3.22E-05 | 0.006491 | 0.010518 | 0.026254 | 0.003    | 0.103875 | 0.04132  | 0.122715 |
| LOC101112888 | NC_019459 | 29244838..29319035               | <a href="#">101112888</a> | -1.38969 | -2.62023 | 3.47E-05 | 0.006894 | 0.70025  | 1.113916 | 0.541205 | 1.475154 | 1.57201  | 2.944067 |
| NAA15        | NC_019474 | complement(17967495..18038756)   | <a href="#">101105853</a> | -0.87828 | -1.83818 | 3.45E-05 | 0.006894 | 10.83277 | 15.39524 | 9.160386 | 19.48143 | 21.14077 | 22.80372 |
| LOC101103408 | NC_019468 | complement(29145973..29150387)   | <a href="#">101103408</a> | -1.0725  | -2.10307 | 3.58E-05 | 0.007054 | 3.552794 | 3.613588 | 2.159035 | 6.692168 | 5.485358 | 6.862071 |
| SERPINA12    | NC_019475 | complement(57960537..57976249)   | <a href="#">101118733</a> | -1.36708 | -2.57948 | 3.7E-05  | 0.007241 | 2.244519 | 2.286856 | 4.481385 | 9.873664 | 3.962312 | 8.608733 |
| DNAJC2       | NC_019461 | complement(44518325..44549601)   | <a href="#">101119299</a> | -0.98117 | -1.97407 | 3.8E-05  | 0.007337 | 11.77986 | 18.8704  | 10.25112 | 26.16766 | 21.43899 | 31.00844 |
| ANKRD12      | NC_019480 | 41743534..41841756               | <a href="#">101106986</a> | -1.38143 | -2.60527 | 3.8E-05  | 0.007337 | 4.14277  | 9.352214 | 3.155321 | 12.96951 | 9.478512 | 19.87798 |
| PLCB1        | NC_019470 | 393916..1234909                  | <a href="#">101103585</a> | -1.14685 | -2.21429 | 3.89E-05 | 0.007457 | 0.764397 | 1.309227 | 0.665943 | 1.527697 | 1.864405 | 2.518951 |
| LOC105601958 | NC_019464 | complement(24060801..24062553)   | <a href="#">105601958</a> | -3.83322 | -14.2532 | 4.04E-05 | 0.007687 | 0.054407 | 0        | 0        | 0.230291 | 0.336811 | 0.345844 |
| NUCB2        | NC_019472 | complement(34652411..34695603)   | <a href="#">101114639</a> | -0.98836 | -1.98393 | 4.06E-05 | 0.007687 | 5.717365 | 5.877061 | 3.156485 | 8.654875 | 9.923523 | 9.911673 |
| ZNF280D      | NC_019464 | 50583804..50711863               | <a href="#">101120087</a> | -1.14715 | -2.21475 | 4.09E-05 | 0.007692 | 0.942517 | 1.607154 | 0.631822 | 2.033522 | 2.076092 | 2.764694 |
| LOC101122637 | NC_019477 | complement(29866379..29866882)   | <a href="#">101122637</a> | 5.598832 | 48.46368 | 4.4E-05  | 0.008214 | 0.189238 | 0.134965 | 3.922246 | 0        | 0        | 0.063311 |
| APCDD1L      | NC_019470 | 56984375..57126334               | <a href="#">101102919</a> | 1.220347 | 2.330027 | 4.61E-05 | 0.008562 | 5.507239 | 5.688024 | 9.580691 | 2.073924 | 4.540353 | 2.103318 |
| CIDEA        | NC_019480 | 43093842..43104646               | <a href="#">101108619</a> | 1.130741 | 2.189712 | 4.65E-05 | 0.008572 | 12.39425 | 13.94259 | 21.63295 | 9.127011 | 4.404296 | 7.655209 |
| DYNLT3       | NC_019484 | complement(35106936..35117796)   | <a href="#">443256</a>    | -0.88229 | -1.8433  | 4.75E-05 | 0.008704 | 17.52182 | 30.69752 | 18.11831 | 37.60436 | 39.84783 | 41.93131 |
| ELOVL3       | NC_019479 | 22007789..22010799               | <a href="#">101106896</a> | 1.067598 | 2.095942 | 5.07E-05 | 0.009229 | 242.6808 | 214.6439 | 424.7585 | 120.9838 | 124.1556 | 162.3322 |
| GLRX         | NC_019462 | complement(92397350..92397464)   | <a href="#">100147797</a> | 1.2459   | 2.371665 | 5.11E-05 | 0.009245 | 103.1167 | 74.92337 | 126.3204 | 34.71435 | 61.21518 | 29.41143 |
| ZC3H15       | NC_019459 | complement(121755246..121775342) | <a href="#">101116282</a> | -0.8047  | -1.74678 | 5.32E-05 | 0.009554 | 18.08634 | 19.58433 | 13.49626 | 27.23377 | 30.73864 | 29.03944 |
| UACA         | NC_019464 | complement(17337918..17427151)   | <a href="#">101107524</a> | -0.94541 | -1.92574 | 5.45E-05 | 0.009732 | 13.34563 | 17.95127 | 8.719595 | 25.15265 | 22.58811 | 27.35116 |
| AKAP9        | NC_019461 | 9170023..9338992                 | <a href="#">101109958</a> | -1.17036 | -2.25068 | 5.54E-05 | 0.009781 | 8.093117 | 15.10396 | 6.130873 | 20.73215 | 16.01839 | 27.61112 |
| CCPG1        | NC_019464 | 51881993..51922887               | <a href="#">105601860</a> | -0.92337 | -1.89654 | 5.55E-05 | 0.009781 | 12.40026 | 19.11337 | 9.899867 | 24.27964 | 22.96009 | 29.32133 |
| DIS3         | NC_019467 | complement(47921723..47946810)   | <a href="#">101122118</a> | -1.05799 | -2.08202 | 5.63E-05 | 0.009816 | 2.470002 | 3.318588 | 1.527692 | 5.266217 | 3.979516 | 5.574891 |
| AP1S2        | NC_019484 | complement(13264264..13291184)   | <a href="#">101104633</a> | -0.86102 | -1.81632 | 5.6E-05  | 0.009816 | 7.680469 | 7.86017  | 5.277977 | 9.342298 | 13.86525 | 13.61599 |
| SCN1A        | NC_019459 | 142287237..142463962             | <a href="#">101123531</a> | -2.60439 | -6.08133 | 5.69E-05 | 0.009853 | 0.003644 | 0.036383 | 0.020786 | 0.123385 | 0.119726 | 0.104229 |



|              |           |                                  |                           |          |          |          |          |          |          |          |          |          |          |
|--------------|-----------|----------------------------------|---------------------------|----------|----------|----------|----------|----------|----------|----------|----------|----------|----------|
| MAPK6        | NC_019464 | complement(55285866..55318516)   | <a href="#">101103324</a> | -0.84905 | -1.80131 | 5.74E-05 | 0.009885 | 15.96358 | 20.34464 | 11.71937 | 27.02037 | 27.83096 | 29.45557 |
| KIF21A       | NC_019460 | 147649692..147832474             | <a href="#">101119971</a> | -0.96252 | -1.94871 | 6.06E-05 | 0.010373 | 9.151261 | 14.70738 | 7.586795 | 20.41456 | 16.92187 | 22.39273 |
| LOC101120378 | NC_019458 | complement(101054250..101061849) | <a href="#">101120378</a> | -1.1353  | -2.19665 | 6.19E-05 | 0.010531 | 13.3065  | 18.3222  | 6.928412 | 31.75033 | 20.8461  | 29.87942 |
| LOC101118931 | NC_019484 | 124531794..124564053             | <a href="#">101118931</a> | -1.69697 | -3.2422  | 6.23E-05 | 0.010537 | 0.18152  | 0.249675 | 0.140531 | 0.44819  | 0.61125  | 0.722239 |
| GP5          | NC_019458 | 191229239..191233282             | <a href="#">101103118</a> | -1.7598  | -3.38651 | 6.3E-05  | 0.01054  | 0.224395 | 0.205765 | 0.164581 | 0.559706 | 0.629689 | 0.752069 |
| MC4R         | NC_019480 | complement(59347550..59350098)   | <a href="#">100147707</a> | -9.38589 | -669.014 | 6.31E-05 | 0.01054  | 0        | 0        | 0        | 0.985451 | 0.463264 | 0.425615 |
| NEMF         | NC_019464 | complement(39845065..39900606)   | <a href="#">101101894</a> | -1.11285 | -2.16273 | 6.65E-05 | 0.011045 | 5.496351 | 9.437899 | 3.613027 | 12.39244 | 11.20769 | 15.53805 |
| BIRC3        | NC_019472 | complement(5944968..5963007)     | <a href="#">101120189</a> | -0.94683 | -1.92763 | 6.73E-05 | 0.011103 | 5.117296 | 6.569414 | 3.632351 | 8.892525 | 8.388582 | 11.44238 |
| C1H21orf91   | NC_019458 | 137439516..137471918             | <a href="#">101116190</a> | -0.96628 | -1.9538  | 6.88E-05 | 0.011232 | 7.557925 | 11.52749 | 5.358264 | 13.80848 | 14.82944 | 17.95478 |
| EEA1         | NC_019460 | complement(128841461..129057440) | <a href="#">101114003</a> | -1.19893 | -2.29569 | 6.86E-05 | 0.011232 | 4.217864 | 7.736194 | 3.16461  | 9.320572 | 8.748399 | 15.76425 |
| SSB          | NC_019459 | complement(138662944..138672175) | <a href="#">101118333</a> | -0.85315 | -1.80644 | 6.93E-05 | 0.011238 | 34.26092 | 48.4761  | 28.43894 | 65.74823 | 58.95781 | 70.9518  |
| SH3BGR       | NC_019458 | 257478482..257546633             | <a href="#">101123341</a> | -1.18897 | -2.2799  | 7.25E-05 | 0.011697 | 4.650567 | 3.860232 | 3.192516 | 5.931321 | 9.477664 | 10.50875 |
| SLCO1A2      | NC_019460 | 193316539..193433818             | <a href="#">101119972</a> | -3.73169 | -13.2847 | 7.51E-05 | 0.012052 | 0.003623 | 0.010337 | 0.008268 | 0.132921 | 0.093175 | 0.072735 |
| CCDC78       | NC_019481 | complement(557880..562514)       | <a href="#">101104626</a> | -3.82697 | -14.1916 | 7.67E-05 | 0.012228 | 0        | 0.036989 | 0.014793 | 0.512217 | 0.074091 | 0.130133 |
| PAGE4        | NC_019484 | complement(52395293..52400657)   | <a href="#">101103624</a> | -3.35247 | -10.2139 | 7.75E-05 | 0.012294 | 0.080081 | 0.057114 | 0.045682 | 0.677919 | 0.343207 | 0.864025 |
| MASP1        | NC_019458 | 198078891..198145602             | <a href="#">101111065</a> | 0.846941 | 1.798683 | 7.95E-05 | 0.012336 | 2.830492 | 2.992122 | 2.73834  | 1.47807  | 1.644144 | 1.495717 |
| SDPR         | NC_019459 | complement(193103107..193119396) | <a href="#">101118507</a> | -0.90771 | -1.87607 | 8E-05    | 0.012336 | 2.782557 | 4.246401 | 2.671827 | 5.687726 | 6.43181  | 5.624557 |
| SGOL2        | NC_019459 | 201766632..201797238             | <a href="#">101104300</a> | -1.32887 | -2.51205 | 7.99E-05 | 0.012336 | 1.086275 | 2.711575 | 0.944546 | 3.21779  | 3.103682 | 5.313695 |
| LOC106990171 | NC_019460 | 59780815..59784833               | <a href="#">106990171</a> | -1.70752 | -3.26599 | 8.04E-05 | 0.012336 | 0.308507 | 0.338505 | 0.171476 | 1.199796 | 0.553737 | 0.837611 |
| KITLG        | NC_019460 | complement(124463931..124594572) | <a href="#">443371</a>    | -0.98679 | -1.98177 | 7.91E-05 | 0.012336 | 6.123632 | 5.711066 | 2.977805 | 10.24374 | 7.529241 | 10.71511 |
| CNFN         | NC_019471 | 49862012..49883113               | <a href="#">101104084</a> | -1.23926 | -2.36078 | 7.96E-05 | 0.012336 | 0.866781 | 1.015984 | 0.864228 | 2.631997 | 1.27596  | 2.367805 |
| AWAT1        | NC_019484 | 59680646..59690183               | <a href="#">101122414</a> | 1.298007 | 2.45889  | 8.19E-05 | 0.012508 | 5.224966 | 9.641257 | 18.48518 | 5.226596 | 3.289942 | 4.632999 |
| AZGP1        | NC_019481 | complement(36339966..36344405)   | <a href="#">101123437</a> | 1.404088 | 2.646505 | 8.25E-05 | 0.012533 | 6.250174 | 5.403209 | 3.411091 | 1.393387 | 1.681422 | 2.416909 |
| KRTAP6-1     | NC_019458 | complement(123206755..123207367) | <a href="#">100499198</a> | 1.414349 | 2.665395 | 8.56E-05 | 0.012731 | 602.4664 | 752.9085 | 1338.772 | 372.5284 | 481.3315 | 134.4275 |
| NEB          | NC_019459 | 156690312..156893984             | <a href="#">101118671</a> | -1.59938 | -3.03013 | 8.53E-05 | 0.012731 | 0.27358  | 0.814197 | 0.276678 | 1.606888 | 0.511461 | 1.908524 |
| LOC105614177 | NC_019461 | 112594941..112595704             | <a href="#">105614177</a> | -2.00746 | -4.02072 | 8.56E-05 | 0.012731 | 1.227571 | 0.534208 | 0.522238 | 1.555856 | 3.834349 | 3.612692 |
| RSF1         | NC_019478 | 17520308..17675988               | <a href="#">101116780</a> | -0.92573 | -1.89964 | 8.51E-05 | 0.012731 | 4.65854  | 6.743131 | 3.16415  | 8.056218 | 8.079443 | 10.82895 |
| LOC101113601 | NC_019466 | 89620425..89627314               | <a href="#">101113601</a> | -4.32174 | -19.9975 | 8.71E-05 | 0.012885 | 0.043551 | 0        | 0        | 0.40964  | 0.47699  | 0.247693 |
| CEP162       | NC_019465 | 52263598..52359023               | <a href="#">101117339</a> | -1.14535 | -2.21199 | 8.83E-05 | 0.01293  | 1.928207 | 3.357724 | 1.360637 | 4.444046 | 3.8692   | 6.016148 |
| SMC3         | NC_019479 | 30010191..30048752               | <a href="#">101119007</a> | -1.08267 | -2.11795 | 8.83E-05 | 0.01293  | 10.42612 | 20.09347 | 9.179463 | 24.38017 | 22.39673 | 35.2403  |
| SEN7         | NC_019458 | complement(164047061..164186542) | <a href="#">101111506</a> | -1.1728  | -2.25449 | 8.97E-05 | 0.012932 | 2.117312 | 3.488926 | 1.183243 | 4.857268 | 4.213896 | 5.858838 |
| PSIP1        | NC_019459 | complement(83426169..83462898)   | <a href="#">100233239</a> | -0.85357 | -1.80697 | 8.95E-05 | 0.012932 | 28.28033 | 41.85463 | 22.60253 | 47.46479 | 51.96619 | 63.92586 |
| RIF1         | NC_019459 | complement(156895567..156958974) | <a href="#">101118926</a> | -1.35765 | -2.56267 | 8.89E-05 | 0.012932 | 1.079588 | 2.546059 | 0.641563 | 3.188768 | 2.916631 | 4.593773 |
| C1H21orf33   | NC_019458 | 262070317..262078368             | <a href="#">100302318</a> | 0.843891 | 1.794884 | 9.05E-05 | 0.012971 | 27.30259 | 27.18153 | 35.26057 | 16.20239 | 16.48801 | 15.8963  |
| LOC443322    | NC_019460 | complement(150116581..150140615) | <a href="#">443322</a>    | -3.75087 | -13.4624 | 9.09E-05 | 0.012972 | 0        | 0.046655 | 0.074633 | 0.599921 | 0.140178 | 0.869937 |
| SEC62        | NC_019458 | complement(215261288..215294063) | <a href="#">101119522</a> | -0.95271 | -1.93551 | 9.3E-05  | 0.013196 | 22.74755 | 35.2011  | 18.10596 | 44.49292 | 44.79566 | 54.28679 |
| GGCT         | NC_019461 | 65734892..65744585               | <a href="#">101102474</a> | -0.82383 | -1.7701  | 9.34E-05 | 0.013196 | 12.44344 | 11.16618 | 9.235026 | 19.25961 | 16.97776 | 20.17673 |
| UGDH         | NC_019463 | complement(58490854..58525038)   | <a href="#">101114271</a> | -0.73848 | -1.66841 | 9.39E-05 | 0.013196 | 15.43271 | 13.6121  | 12.32755 | 20.11365 | 23.34029 | 23.6188  |
| GOLGA4       | NC_019476 | 10729066..10833035               | <a href="#">101109394</a> | -1.13415 | -2.19489 | 9.54E-05 | 0.013339 | 10.10154 | 18.93013 | 8.657313 | 22.14164 | 20.99589 | 37.49484 |
| PRPF40A      | NC_019459 | 155755311..155813748             | <a href="#">101116380</a> | -0.95827 | -1.94298 | 9.58E-05 | 0.01334  | 17.32014 | 23.86225 | 11.76394 | 31.27302 | 31.50024 | 37.51037 |
| ECM2         | NC_019459 | 28627247..28667618               | <a href="#">101108189</a> | -1.25562 | -2.3877  | 9.93E-05 | 0.013717 | 8.529021 | 21.05751 | 6.872242 | 25.2981  | 26.25186 | 33.71719 |
| NRXN1        | NC_019460 | 73066113..74278588               | <a href="#">101104646</a> | -2.12991 | -4.37691 | 0.0001   | 0.013717 | 0.12138  | 0.084871 | 0.027154 | 0.537273 | 0.217602 | 0.241262 |

|              |           |                                  |                           |          |          |          |          |          |          |          |          |          |          |
|--------------|-----------|----------------------------------|---------------------------|----------|----------|----------|----------|----------|----------|----------|----------|----------|----------|
| POF1B        | NC_019484 | complement(73024346..73123532)   | <a href="#">101102041</a> | -1.32381 | -2.50327 | 9.99E-05 | 0.013717 | 7.733847 | 17.5503  | 5.186293 | 27.61003 | 15.68377 | 31.15836 |
| PPP1R12A     | NC_019460 | complement(115484615..115655544) | <a href="#">641303</a>    | -0.89411 | -1.85847 | 0.000102 | 0.013902 | 15.10852 | 17.90827 | 10.0787  | 22.90001 | 25.0151  | 30.05971 |
| NIN          | NC_019464 | complement(40652482..40755712)   | <a href="#">101104912</a> | -1.08416 | -2.12015 | 0.000102 | 0.013902 | 2.883808 | 4.455233 | 1.640081 | 6.387628 | 5.038065 | 7.133328 |
| ACAD9        | NC_019476 | 58731288..58745933               | <a href="#">101111495</a> | 0.783707 | 1.721548 | 0.000104 | 0.013997 | 44.0111  | 57.77862 | 62.11002 | 30.65296 | 28.2077  | 33.65444 |
| LOC101116002 | NC_019458 | 63033440..63062397               | <a href="#">101116002</a> | -1.52527 | -2.8784  | 0.000109 | 0.014473 | 15.58583 | 6.59724  | 4.446377 | 28.34674 | 9.476649 | 35.73076 |
| LOC101113219 | NC_019460 | complement(42944753..42945271)   | <a href="#">101113219</a> | 1.176064 | 2.259594 | 0.00011  | 0.014473 | 12.9557  | 14.41711 | 21.2459  | 5.790609 | 7.613374 | 7.469939 |
| SRD5A2       | NC_019460 | 91902135..91951099               | <a href="#">100820756</a> | -4.89345 | -29.7219 | 0.000108 | 0.014473 | 0.015478 | 0        | 0        | 0.283896 | 0.044224 | 0.264093 |
| DGKB         | NC_019461 | complement(22424489..23306033)   | <a href="#">101102720</a> | -2.00283 | -4.00786 | 0.00011  | 0.014473 | 0.097873 | 0.081721 | 0.021788 | 0.208819 | 0.245538 | 0.330635 |
| FAM185A      | NC_019461 | 44034100..44124744               | <a href="#">101103470</a> | -1.3109  | -2.48097 | 0.000109 | 0.014473 | 0.84087  | 1.81917  | 0.84184  | 2.703069 | 1.538359 | 4.204736 |
| ZG16B        | NC_019481 | complement(2203223..2205025)     | <a href="#">105604849</a> | 2.597875 | 6.053941 | 0.000109 | 0.014473 | 2.101582 | 2.965821 | 1.122334 | 0        | 0.734604 | 0.269271 |
| CEP120       | NC_019462 | 27773888..27864407               | <a href="#">101110325</a> | -1.00885 | -2.01231 | 0.000114 | 0.014785 | 3.180518 | 4.330073 | 1.987135 | 5.407201 | 5.442036 | 7.752449 |
| MDK          | NC_019472 | 74497609..74500468               | <a href="#">101114137</a> | 1.003939 | 2.005468 | 0.000113 | 0.014785 | 15.11714 | 14.99829 | 19.22647 | 5.744316 | 9.912998 | 8.279188 |
| ATRX         | NC_019484 | 64641762..64917198               | <a href="#">101117394</a> | -1.11588 | -2.16728 | 0.000115 | 0.014964 | 6.894793 | 12.39274 | 5.062833 | 15.80889 | 13.43271 | 22.21818 |
| TBC1D23      | NC_019458 | 162845375..162900677             | <a href="#">101108794</a> | -0.84435 | -1.79545 | 0.000118 | 0.01519  | 22.96368 | 26.74482 | 15.60353 | 39.1221  | 38.98652 | 36.17986 |
| OGFOD3       | NC_019468 | 49473464..49488072               | <a href="#">101104767</a> | 0.960693 | 1.946244 | 0.00012  | 0.015459 | 10.52821 | 9.222805 | 13.51493 | 5.542405 | 6.587834 | 4.542633 |
| MMRN1        | NC_019463 | complement(34599682..34705043)   | <a href="#">101117586</a> | -1.45789 | -2.74706 | 0.000124 | 0.015858 | 0.338991 | 1.365286 | 0.546011 | 1.913139 | 2.103287 | 2.044741 |
| CCDC112      | NC_019464 | complement(3862729..3889022)     | <a href="#">101123303</a> | -0.90402 | -1.87127 | 0.000125 | 0.015873 | 0.992922 | 1.178608 | 1.008723 | 1.603386 | 2.040094 | 2.123215 |
| DNAJB4       | NC_019458 | 53715910..53759449               | <a href="#">101101935</a> | -0.95119 | -1.93346 | 0.000127 | 0.016084 | 2.629226 | 2.997031 | 1.547901 | 3.93121  | 4.009741 | 5.542771 |
| ROCK2        | NC_019460 | complement(19976250..20109888)   | <a href="#">101103800</a> | -1.06865 | -2.09748 | 0.000127 | 0.016084 | 5.036542 | 8.495183 | 3.782517 | 10.13258 | 9.6846   | 15.57902 |
| ARID4A       | NC_019464 | 67459988..67518849               | <a href="#">101122697</a> | -0.96688 | -1.95462 | 0.000134 | 0.016844 | 5.328285 | 8.431529 | 3.813218 | 10.62952 | 9.280654 | 13.55973 |
| NCDN         | NC_019458 | 10282519..10291279               | <a href="#">101115750</a> | 0.79588  | 1.736136 | 0.000135 | 0.016854 | 9.239743 | 6.255373 | 9.164545 | 4.122894 | 4.521922 | 5.111831 |
| CEBPE        | NC_019464 | 21353016..21355895               | <a href="#">101122954</a> | -3.21402 | -9.27931 | 0.000135 | 0.016854 | 0.056975 | 0.040635 | 0.032502 | 0.582801 | 0.38662  | 0.300216 |
| USP15        | NC_019460 | complement(156829611..156958015) | <a href="#">101113139</a> | -0.97559 | -1.96644 | 0.000137 | 0.016908 | 2.184695 | 3.004969 | 1.263224 | 3.711466 | 3.872979 | 4.785673 |
| WNT2         | NC_019461 | 50996179..51050036               | <a href="#">100126577</a> | 1.071799 | 2.102053 | 0.000137 | 0.016908 | 3.552263 | 4.038739 | 5.027856 | 1.9817   | 1.794201 | 2.036245 |
| TRPM7        | NC_019464 | 56637394..56727196               | <a href="#">100037693</a> | -1.22155 | -2.33198 | 0.000138 | 0.016908 | 1.785781 | 4.430354 | 1.473804 | 4.874914 | 5.552496 | 7.129433 |
| P2RY14       | NC_019458 | 234738284..234800900             | <a href="#">101117637</a> | -1.84668 | -3.59672 | 0.000141 | 0.017205 | 0.167805 | 0.099732 | 0.159542 | 0.286082 | 0.519402 | 0.691225 |
| DMXL1        | NC_019462 | complement(32076336..32207850)   | <a href="#">101115363</a> | -1.02101 | -2.02934 | 0.000141 | 0.017205 | 2.238905 | 3.63267  | 1.407313 | 4.274344 | 4.500327 | 5.645578 |
| ELOVL4       | NC_019465 | complement(6777159..6818334)     | <a href="#">101113417</a> | 0.912038 | 1.881702 | 0.000145 | 0.017622 | 123.4389 | 105.3535 | 156.3183 | 59.16935 | 56.2394  | 82.69368 |
| LOC105614635 | NC_019460 | complement(85626353..85632212)   | <a href="#">105614635</a> | -1.85448 | -3.61622 | 0.000146 | 0.017649 | 0.189884 | 0.174119 | 0.043328 | 0.405691 | 0.492154 | 0.536348 |
| SKIV2L2      | NC_019473 | complement(23797292..23888623)   | <a href="#">101115066</a> | -0.81414 | -1.75825 | 0.00015  | 0.018    | 8.964911 | 10.06239 | 6.106597 | 14.06002 | 14.23621 | 14.71718 |
| ACTG2        | NC_019460 | 95503479..95527600               | <a href="#">101114256</a> | -0.71102 | -1.63696 | 0.000154 | 0.018474 | 37.06799 | 35.832   | 42.16174 | 65.97073 | 65.80868 | 51.52982 |
| AMELX        | NC_019484 | 8828662..8833506                 | <a href="#">101118759</a> | -3.91741 | -15.1097 | 0.000155 | 0.018474 | 0.021054 | 0.090096 | 0        | 0.445586 | 0.330858 | 0.781867 |
| CEBPZ        | NC_019460 | 86648954..86672368               | <a href="#">101121334</a> | -1.06933 | -2.09846 | 0.000156 | 0.018497 | 8.868348 | 18.99164 | 7.398668 | 23.16031 | 20.94231 | 28.21375 |
| KRAS         | NC_019460 | 189342162..189386130             | <a href="#">101114005</a> | -0.78251 | -1.72012 | 0.000164 | 0.01945  | 5.970923 | 7.897673 | 4.655145 | 9.172018 | 11.75792 | 10.17468 |
| SCN7A        | NC_019459 | 141970165..142053353             | <a href="#">101109522</a> | -2.40863 | -5.30971 | 0.000167 | 0.019559 | 0.004374 | 0.168465 | 0.054897 | 0.339441 | 0.390562 | 0.458785 |
| PLB1         | NC_019460 | 35242956..35375830               | <a href="#">101113054</a> | 0.840899 | 1.791166 | 0.000167 | 0.019559 | 6.538188 | 6.257304 | 9.883291 | 4.857597 | 3.441644 | 3.97279  |
| SEMA3E       | NC_019461 | 36930372..37203081               | <a href="#">101113839</a> | -0.98075 | -1.97349 | 0.000167 | 0.019559 | 2.627204 | 3.554678 | 1.861201 | 4.579903 | 4.244361 | 6.608761 |
| SMC4         | NC_019458 | complement(224944115..224976211) | <a href="#">101106049</a> | -1.03296 | -2.04622 | 0.000168 | 0.019607 | 5.892375 | 11.50555 | 4.94549  | 13.01083 | 12.79083 | 18.82481 |
| STRA6        | NC_019475 | 33342881..33365753               | <a href="#">101120527</a> | 1.310591 | 2.480431 | 0.00017  | 0.019661 | 2.521069 | 5.356254 | 7.107513 | 2.087396 | 2.568489 | 1.2585   |
| DENND4A      | NC_019464 | complement(12340676..12450311)   | <a href="#">101122440</a> | -1.08019 | -2.11432 | 0.000171 | 0.019782 | 1.7276   | 3.495582 | 1.356325 | 4.315869 | 3.927992 | 5.343108 |
| KRT1         | NC_019460 | 133400378..133406299             | <a href="#">101109430</a> | -1.19132 | -2.28361 | 0.000173 | 0.019845 | 223.0614 | 175.6465 | 159.829  | 614.146  | 211.3827 | 406.6143 |
| ADGRL3       | NC_019463 | 76563989..77502551               | <a href="#">101111884</a> | -0.98888 | -1.98464 | 0.000173 | 0.01985  | 1.02     | 1.262086 | 0.757564 | 1.786775 | 1.358874 | 2.70589  |

|              |           |                                  |                           |          |          |          |          |          |          |          |          |          |          |
|--------------|-----------|----------------------------------|---------------------------|----------|----------|----------|----------|----------|----------|----------|----------|----------|----------|
| ABCA10       | NC_019468 | 60176870..60227471               | <a href="#">101108240</a> | 0.800581 | 1.741803 | 0.000185 | 0.021143 | 6.777071 | 6.340044 | 4.776621 | 4.103223 | 3.028075 | 2.856523 |
| GAPT         | NC_019473 | complement(20862169..20867361)   | <a href="#">101110362</a> | -1.44579 | -2.72412 | 0.000187 | 0.02122  | 1.531769 | 0.69115  | 0.606313 | 2.194264 | 2.969792 | 2.353144 |
| SPTSSB       | NC_019458 | 223940729..223972223             | <a href="#">101103775</a> | -0.7151  | -1.64159 | 0.000188 | 0.021263 | 33.84578 | 31.489   | 34.36993 | 51.50209 | 60.00217 | 47.82135 |
| LOC101108887 | NC_019459 | complement(68014500..68066852)   | <a href="#">101108887</a> | -0.86872 | -1.82604 | 0.000192 | 0.021332 | 7.868031 | 10.9861  | 5.881531 | 15.788   | 12.77813 | 15.41098 |
| LOC101101923 | NC_019474 | complement(68982349..68999079)   | <a href="#">101101923</a> | 1.3916   | 2.623694 | 0.00019  | 0.021332 | 2.032201 | 4.538962 | 5.891277 | 2.193803 | 1.03316  | 1.386385 |
| CHGA         | NC_019475 | 56428370..56441509               | <a href="#">101114907</a> | 2.273685 | 4.835567 | 0.00019  | 0.021332 | 1.360469 | 0.408544 | 0.308619 | 0.179602 | 0.159121 | 0.079851 |
| HTATIP2      | NC_019478 | complement(23843262..23856881)   | <a href="#">101114318</a> | 0.788195 | 1.726913 | 0.000192 | 0.021332 | 17.33751 | 15.36493 | 24.0723  | 8.998984 | 11.53779 | 11.37612 |
| RAB11FIP2    | NC_019479 | complement(37177703..37220788)   | <a href="#">101105457</a> | -0.9446  | -1.92465 | 0.000192 | 0.021332 | 4.30207  | 6.103012 | 2.732438 | 7.737281 | 7.890145 | 9.03109  |
| GPR141       | NC_019461 | complement(59640949..59707492)   | <a href="#">101114515</a> | -1.83673 | -3.57199 | 0.000196 | 0.021608 | 0.500943 | 0.306235 | 0.163294 | 0.858239 | 1.086242 | 1.436517 |
| UPF2         | NC_019470 | complement(15587287..15682170)   | <a href="#">101116751</a> | -1.09941 | -2.14267 | 0.000196 | 0.021608 | 7.827832 | 13.91262 | 4.928797 | 18.91662 | 14.29463 | 22.52841 |
| KIF3A        | NC_019462 | 19098082..19177319               | <a href="#">101122522</a> | -0.98769 | -1.98301 | 0.000206 | 0.022548 | 3.836048 | 6.950931 | 2.94712  | 7.921007 | 8.229724 | 10.44268 |
| IQGAP2       | NC_019464 | 7416632..7724494                 | <a href="#">101105506</a> | -0.77699 | -1.71356 | 0.000207 | 0.022548 | 3.543937 | 4.929169 | 3.60876  | 6.082057 | 6.677168 | 7.387288 |
| TRIP11       | NC_019475 | complement(55529993..55598668)   | <a href="#">101113176</a> | -1.05221 | -2.0737  | 0.000207 | 0.022548 | 4.453722 | 8.357364 | 3.489265 | 10.41707 | 8.584826 | 13.96375 |
| IFITM3       | NC_019478 | complement(49640241..49641703)   | <a href="#">101104700</a> | 0.864462 | 1.82066  | 0.000212 | 0.02301  | 255.1987 | 162.9026 | 234.0233 | 85.12135 | 156.7791 | 106.4858 |
| LOC101105274 | NC_019472 | complement(77716562..77722885)   | <a href="#">101105274</a> | -3.15097 | -8.88252 | 0.000217 | 0.023425 | 0.116515 | 0.142456 | 0.01899  | 1.737862 | 0.546915 | 0.167061 |
| NAIP         | NC_019473 | complement(10129481..10176025)   | <a href="#">101110450</a> | -1.96037 | -3.89162 | 0.000221 | 0.023767 | 0.229598 | 0.278724 | 0.072454 | 0.210218 | 0.844429 | 1.14975  |
| COPS2        | NC_019464 | 58021237..58060221               | <a href="#">101109182</a> | -1.00057 | -2.00078 | 0.000224 | 0.02381  | 2.453769 | 4.789062 | 1.923051 | 5.491738 | 5.415852 | 7.011354 |
| ACSS2        | NC_019470 | 63633566..63677889               | <a href="#">101114126</a> | 0.764356 | 1.698612 | 0.000223 | 0.02381  | 28.32556 | 24.71516 | 41.79756 | 20.56898 | 17.6873  | 15.9218  |
| LOC105605177 | NC_019483 | complement(18890549..18901383)   | <a href="#">105605177</a> | 1.579175 | 2.987989 | 0.000223 | 0.02381  | 0.310638 | 0.437227 | 0.575035 | 0.095783 | 0.144006 | 0.185827 |
| FHL1         | NC_019484 | complement(93754680..93797838)   | <a href="#">100307044</a> | -0.76017 | -1.69369 | 0.000225 | 0.023888 | 15.63874 | 13.98397 | 17.44268 | 18.6435  | 33.86779 | 25.14563 |
| RAB27B       | NC_019480 | 54245796..54425963               | <a href="#">101120036</a> | -0.85726 | -1.81159 | 0.000226 | 0.023893 | 4.828125 | 6.278481 | 3.374234 | 7.792609 | 7.481984 | 10.25231 |
| ZCCHC6       | NC_019459 | 33325747..33384555               | <a href="#">101114240</a> | -0.89445 | -1.8589  | 0.000228 | 0.02402  | 3.233939 | 5.07881  | 2.28595  | 6.20394  | 5.81692  | 7.197776 |
| KIF20B       | NC_019479 | 11064849..11148849               | <a href="#">101122564</a> | -1.07677 | -2.10931 | 0.00023  | 0.02402  | 2.084411 | 3.709767 | 1.524161 | 4.190802 | 4.415893 | 6.449718 |
| THOC2        | NC_019484 | complement(101814463..101918311) | <a href="#">101123613</a> | -1.04484 | -2.06314 | 0.00023  | 0.02402  | 3.611161 | 6.312638 | 2.361517 | 7.469562 | 7.265708 | 10.01009 |
| ZNF644       | NC_019458 | complement(67428741..67523259)   | <a href="#">101122642</a> | -1.22601 | -2.33919 | 0.000232 | 0.024092 | 1.201538 | 2.476166 | 0.700833 | 2.714404 | 2.939701 | 4.359321 |
| LOC101123186 | NC_019459 | complement(165081477..165082011) | <a href="#">101123186</a> | -1.15034 | -2.21967 | 0.000234 | 0.024166 | 43.88486 | 28.26856 | 35.5599  | 61.95944 | 132.1358 | 39.72177 |
| CEP350       | NC_019469 | 59168497..59323473               | <a href="#">101122613</a> | -1.05821 | -2.08234 | 0.000234 | 0.024166 | 2.673892 | 5.36021  | 2.040727 | 6.040053 | 5.875878 | 8.576146 |
| PHAX         | NC_019462 | complement(24712253..24722176)   | <a href="#">101107861</a> | -0.84616 | -1.79771 | 0.000242 | 0.024848 | 11.81335 | 16.68803 | 8.950074 | 20.40719 | 21.37544 | 23.84208 |
| SASS6        | NC_019458 | complement(76529023..76570279)   | <a href="#">101112610</a> | -1.11919 | -2.17224 | 0.000247 | 0.025129 | 1.79828  | 3.004808 | 1.118275 | 4.115296 | 3.590958 | 4.831516 |
| TPM1         | NC_019464 | complement(43997072..44026561)   | <a href="#">100145865</a> | -0.82686 | -1.77382 | 0.000247 | 0.025129 | 104.8097 | 82.75769 | 72.15723 | 150.3935 | 139.8778 | 156.7046 |
| UBE2L6       | NC_019472 | complement(77909601..77918254)   | <a href="#">101121201</a> | 0.940409 | 1.919072 | 0.000246 | 0.025129 | 28.97903 | 15.3117  | 21.69343 | 9.997036 | 14.14091 | 9.282268 |
| FGA          | NC_019474 | 2688286..2696532                 | <a href="#">101102090</a> | 3.921958 | 15.15748 | 0.000254 | 0.02567  | 0.023223 | 0.016563 | 0.9472   | 0.032765 | 0.016588 | 0.011654 |
| ZNF184       | NC_019477 | 30034270..30055258               | <a href="#">101121720</a> | -1.10408 | -2.14962 | 0.000254 | 0.02567  | 2.109625 | 2.653511 | 1.227775 | 5.892796 | 2.877861 | 3.750664 |
| TMEM45A      | NC_019458 | 163178215..163287672             | <a href="#">101110467</a> | 0.758908 | 1.692209 | 0.000256 | 0.025731 | 19.16399 | 16.65198 | 26.31482 | 11.38048 | 10.60556 | 13.57491 |
| FILIP1L      | NC_019458 | complement(162381751..162687240) | <a href="#">101107834</a> | -1.0495  | -2.06981 | 0.000264 | 0.026441 | 1.734734 | 1.220886 | 0.894874 | 2.782777 | 1.856622 | 3.071342 |
| VPS13A       | NC_019459 | complement(58940523..59203757)   | <a href="#">101112545</a> | -1.12786 | -2.18534 | 0.000267 | 0.026699 | 0.844868 | 1.959425 | 0.736358 | 2.122856 | 2.165532 | 3.272785 |
| PIK3CA       | NC_019458 | complement(205904440..205989643) | <a href="#">101110015</a> | -1.12144 | -2.17564 | 0.000268 | 0.026731 | 1.154864 | 2.483896 | 0.945081 | 2.706437 | 2.904471 | 4.132708 |
| LOC101116991 | NC_019464 | 24035721..24041006               | <a href="#">101116991</a> | -1.20378 | -2.30342 | 0.00027  | 0.026758 | 4.359751 | 1.506688 | 2.244833 | 6.545705 | 5.902824 | 5.654168 |
| MYOCD        | NC_019468 | 30646505..30735045               | <a href="#">101104413</a> | -1.37442 | -2.59264 | 0.000271 | 0.026787 | 0.220951 | 0.19825  | 0.162635 | 0.397219 | 0.539675 | 0.527578 |
| ALG12        | NC_019460 | complement(223256185..223265150) | <a href="#">101112896</a> | 0.886875 | 1.849166 | 0.000272 | 0.026801 | 6.745587 | 7.395624 | 10.24108 | 4.413732 | 5.11978  | 3.328018 |
| PKN2         | NC_019458 | 65236597..65378319               | <a href="#">101118744</a> | -0.87924 | -1.83941 | 0.000273 | 0.026839 | 3.402151 | 5.179129 | 2.652663 | 5.886789 | 6.498291 | 7.759202 |
| LOC101111915 | NC_019477 | 30644308..30646897               | <a href="#">101111915</a> | -1.51807 | -2.86407 | 0.000274 | 0.026865 | 0.441897 | 0.560289 | 0.686223 | 1.359523 | 1.104755 | 2.199108 |

|              |           |                                  |                           |          |          |          |          |          |          |          |          |          |          |
|--------------|-----------|----------------------------------|---------------------------|----------|----------|----------|----------|----------|----------|----------|----------|----------|----------|
| CLOCK        | NC_019463 | complement(70783114..70907400)   | <a href="#">100171391</a> | -1.10959 | -2.15784 | 0.000279 | 0.02711  | 1.558995 | 2.490204 | 0.868844 | 2.84833  | 2.972288 | 4.526855 |
| ZNF518A      | NC_019479 | 16692692..16720962               | <a href="#">10110983</a>  | -1.32928 | -2.51277 | 0.000279 | 0.02711  | 1.229882 | 2.956203 | 0.704577 | 3.770786 | 2.940787 | 5.301763 |
| PRKRIR       | NC_019472 | complement(53827717..53856272)   | <a href="#">101108951</a> | -0.81807 | -1.76305 | 0.000283 | 0.027387 | 6.841738 | 6.965168 | 3.946964 | 8.835669 | 11.1219  | 10.5273  |
| PLIN2        | NC_019459 | complement(87123150..87137944)   | <a href="#">100125354</a> | 0.971787 | 1.961268 | 0.000285 | 0.027411 | 115.5424 | 87.96615 | 200.5364 | 64.65524 | 56.17786 | 78.30842 |
| UHRF1BP1L    | NC_019460 | complement(168907108..168994369) | <a href="#">101104223</a> | -0.97099 | -1.96018 | 0.000285 | 0.027411 | 1.546055 | 2.699866 | 1.084438 | 3.031936 | 3.181018 | 3.990415 |
| PCSK1        | NC_019462 | complement(92996990..93049213)   | <a href="#">443029</a>    | -2.1404  | -4.40883 | 0.000291 | 0.027909 | 0.016179 | 0.061541 | 0.055377 | 0.220664 | 0.146384 | 0.189449 |
| TCN2         | NC_019474 | 69070520..69087488               | <a href="#">101112851</a> | 1.076875 | 2.109462 | 0.000296 | 0.028264 | 7.515156 | 9.291274 | 17.97039 | 3.446369 | 6.524535 | 6.063297 |
| LOC101112166 | NC_019474 | complement(69009235..69018621)   | <a href="#">101112166</a> | 1.129727 | 2.188173 | 0.000303 | 0.02884  | 6.325495 | 13.96437 | 16.98871 | 7.11912  | 4.074275 | 5.367035 |
| ALDH1A1      | NC_019459 | 63267948..63323060               | <a href="#">443343</a>    | -0.89904 | -1.86483 | 0.000312 | 0.029551 | 7.381928 | 15.58168 | 12.61134 | 21.07869 | 24.68687 | 19.10986 |
| DMD          | NC_019484 | complement(28400851..31063619)   | <a href="#">101114682</a> | -0.71334 | -1.63959 | 0.000312 | 0.029551 | 2.201951 | 2.885618 | 2.358511 | 3.965787 | 3.670207 | 4.232188 |
| PPIP5K2      | NC_019462 | 99323075..99399412               | <a href="#">101114441</a> | -1.05719 | -2.08087 | 0.000317 | 0.029774 | 4.376817 | 6.842192 | 2.187879 | 8.813853 | 8.094134 | 10.32338 |
| HBS1L        | NC_019465 | complement(59954272..60041246)   | <a href="#">101109622</a> | -0.84497 | -1.79623 | 0.000316 | 0.029774 | 3.437779 | 5.371095 | 2.759809 | 6.060888 | 6.868834 | 7.351264 |
| FITM2        | NC_019470 | complement(72197197..72203246)   | <a href="#">101108768</a> | 0.712099 | 1.638186 | 0.000318 | 0.029787 | 30.45554 | 28.42479 | 39.27087 | 19.83662 | 18.64377 | 19.66307 |
| ELOVL1       | NC_019458 | complement(17809090..17813902)   | <a href="#">101110801</a> | 0.942678 | 1.922093 | 0.00032  | 0.029877 | 164.1384 | 113.9981 | 242.0041 | 89.22045 | 77.13698 | 95.34383 |
| BST1         | NC_019463 | 110325067..110345003             | <a href="#">101116575</a> | 2.426226 | 5.374856 | 0.000329 | 0.030597 | 4.789934 | 3.438526 | 4.06294  | 0.176684 | 0.044724 | 1.955994 |
| CD2AP        | NC_019477 | 20565474..20653099               | <a href="#">101117542</a> | -0.84704 | -1.79881 | 0.000337 | 0.031286 | 9.820728 | 15.63388 | 7.928132 | 18.14019 | 18.40369 | 22.04171 |
| ZFP69B       | NC_019458 | 14786586..14810741               | <a href="#">101122155</a> | -2.45136 | -5.46931 | 0.000339 | 0.031323 | 0.064461 | 0.045974 | 0.088253 | 0.163707 | 0.221011 | 0.67285  |
| VPS26A       | NC_019482 | 25222758..25248048               | <a href="#">101104294</a> | -0.73868 | -1.66865 | 0.00034  | 0.031323 | 16.70703 | 21.87329 | 13.65649 | 26.65869 | 29.44071 | 28.88224 |
| DNTTIP2      | NC_019458 | complement(70139416..70153481)   | <a href="#">101107316</a> | -0.92763 | -1.90215 | 0.000342 | 0.031448 | 7.590119 | 12.09219 | 4.959298 | 14.37505 | 14.05457 | 17.31253 |
| LOC101116267 | NC_019458 | 63087970..63121602               | <a href="#">101116267</a> | -1.58261 | -2.99511 | 0.000345 | 0.031549 | 2.714824 | 0.840728 | 0.68701  | 4.838358 | 1.301294 | 6.023202 |
| FKBP1B       | NC_019460 | 31509116..31519653               | <a href="#">101108378</a> | 1.058279 | 2.082446 | 0.000346 | 0.031549 | 8.66895  | 7.675109 | 9.529367 | 3.572571 | 5.099445 | 3.494419 |
| LOC101117868 | NC_019471 | 58293788..58319087               | <a href="#">101117868</a> | -1.48947 | -2.80785 | 0.000352 | 0.032018 | 0.518481 | 0.269724 | 0.424516 | 1.144627 | 0.967261 | 1.236674 |
| LOC101109901 | NC_019471 | 46732368..46753949               | <a href="#">101109901</a> | -1.28473 | -2.43637 | 0.000356 | 0.032159 | 1.271383 | 0.83782  | 0.746473 | 2.695953 | 1.99685  | 2.096895 |
| TKT          | NC_019476 | 47704693..47727998               | <a href="#">101107229</a> | 0.691205 | 1.614632 | 0.000355 | 0.032159 | 101.6007 | 98.01815 | 129.8072 | 66.52884 | 70.31257 | 61.49121 |
| TSPAN18      | NC_019472 | 72883345..73090817               | <a href="#">101111390</a> | 0.723072 | 1.650693 | 0.000358 | 0.032259 | 5.448648 | 4.754768 | 7.734516 | 3.638616 | 3.901738 | 3.022068 |
| PMS1         | NC_019459 | complement(118231689..118431309) | <a href="#">101111691</a> | -0.93892 | -1.91709 | 0.00036  | 0.032352 | 2.446101 | 3.900542 | 1.7786   | 4.878074 | 4.63148  | 5.67232  |
| CASP8AP2     | NC_019465 | complement(47453359..47486333)   | <a href="#">101109100</a> | -1.18049 | -2.26654 | 0.000366 | 0.0328   | 1.995543 | 4.04223  | 1.309901 | 4.483633 | 4.207875 | 7.558751 |
| KIAA1551     | NC_019460 | complement(182421795..182453328) | <a href="#">101106510</a> | -1.36031 | -2.5674  | 0.000372 | 0.033215 | 1.891417 | 4.586844 | 1.080411 | 4.80851  | 4.510664 | 9.639171 |
| CFL2         | NC_019475 | complement(43945030..43949313)   | <a href="#">101118388</a> | -0.81529 | -1.75965 | 0.000374 | 0.033266 | 5.180842 | 4.154048 | 3.960643 | 6.267578 | 9.180016 | 7.339091 |
| UBE2V2       | NC_019466 | 32333007..32352511               | <a href="#">101111640</a> | -0.70028 | -1.62482 | 0.000376 | 0.033274 | 39.84978 | 43.08278 | 29.02332 | 53.74657 | 62.66612 | 60.70675 |
| ANGPT4       | NC_019470 | 59383921..59435376               | <a href="#">101107460</a> | 0.905413 | 1.873081 | 0.000376 | 0.033274 | 2.663196 | 2.936756 | 2.024236 | 1.048248 | 1.879864 | 1.055459 |
| SYN2         | NC_019476 | complement(56772726..56927614)   | <a href="#">101107824</a> | 1.334994 | 2.522744 | 0.000377 | 0.033274 | 2.992263 | 2.049087 | 2.662412 | 1.460374 | 0.5377   | 0.950711 |
| CRABP1       | NC_019475 | 29780456..29787473               | <a href="#">101122057</a> | 0.699076 | 1.623465 | 0.00038  | 0.033393 | 71.33307 | 93.4451  | 83.48722 | 49.93807 | 51.34177 | 47.63172 |
| TMEM119      | NC_019474 | 64006897..64018175               | <a href="#">101102841</a> | 0.82579  | 1.772505 | 0.000386 | 0.033793 | 20.91205 | 14.68588 | 21.76957 | 9.228475 | 14.98316 | 7.344277 |
| HIF1A        | NC_019464 | 70743923..70770256               | <a href="#">443519</a>    | -0.78563 | -1.72385 | 0.000388 | 0.033855 | 25.09964 | 26.01499 | 17.7895  | 29.88131 | 46.42769 | 39.51359 |
| LOC101123254 | NC_019479 | 10140647..10162699               | <a href="#">101123254</a> | -3.45199 | -10.9434 | 0.000389 | 0.033911 | 0.011675 | 0.033308 | 0.013321 | 0.131783 | 0.016679 | 0.474587 |
| FUOM         | NC_019479 | 50696035..50698729               | <a href="#">101113117</a> | 1.173594 | 2.255729 | 0.000395 | 0.034304 | 12.89744 | 13.60451 | 18.25954 | 7.34001  | 5.93527  | 6.019128 |
| CCDC88A      | NC_019460 | 68406824..68525029               | <a href="#">101122010</a> | -1.25913 | -2.39351 | 0.000402 | 0.034785 | 1.614912 | 3.369773 | 0.851149 | 3.851092 | 3.544096 | 6.250098 |
| U2SURP       | NC_019458 | complement(243833635..243887311) | <a href="#">101104449</a> | -0.84685 | -1.79857 | 0.000407 | 0.034871 | 9.41109  | 12.51254 | 6.058389 | 15.59443 | 14.57572 | 18.85019 |
| KRTAP1-1     | NC_019468 | complement(40771911..40779617)   | <a href="#">100294612</a> | 1.011936 | 2.016615 | 0.000406 | 0.034871 | 715.7815 | 487.5961 | 1022.856 | 341.1229 | 494.678  | 238.6737 |
| ESCO1        | NC_019480 | 34875801..34912630               | <a href="#">101123257</a> | -1.19153 | -2.28395 | 0.000404 | 0.034871 | 1.057338 | 2.252849 | 0.72509  | 2.457878 | 2.429232 | 4.110078 |
| OSBPL8       | NC_019460 | complement(111994126..112164151) | <a href="#">101122935</a> | -0.92383 | -1.89715 | 0.000408 | 0.034876 | 3.914747 | 7.050557 | 2.885052 | 7.529826 | 8.065939 | 10.07326 |

|              |           |                                  |                           |          |          |          |          |          |          |          |          |          |          |
|--------------|-----------|----------------------------------|---------------------------|----------|----------|----------|----------|----------|----------|----------|----------|----------|----------|
| LOC101121369 | NC_019471 | 56077621..56102315               | <a href="#">101121369</a> | -1.57795 | -2.98545 | 0.000412 | 0.035167 | 1.124505 | 4.119078 | 0.821093 | 6.32091  | 3.35428  | 8.026817 |
| ZNF260       | NC_019471 | 46046570..46062211               | <a href="#">105607589</a> | -1.2244  | -2.33659 | 0.000414 | 0.0352   | 1.193484 | 3.13631  | 1.249405 | 3.488502 | 3.306107 | 5.924907 |
| THAP2        | NC_019460 | 107456173..107472620             | <a href="#">101119806</a> | -1.1025  | -2.14726 | 0.000424 | 0.035879 | 3.191421 | 4.270312 | 1.619642 | 5.060581 | 4.944298 | 8.956492 |
| KIAA1024     | NC_019475 | 24591719..24627550               | <a href="#">101113798</a> | -2.88119 | -7.3676  | 0.000425 | 0.035879 | 0.00419  | 0.011953 | 0.00956  | 0.04138  | 0.056862 | 0.077795 |
| TINAGL1      | NC_019459 | complement(234989197..234999118) | <a href="#">101119187</a> | 0.90311  | 1.870093 | 0.00043  | 0.036267 | 12.76662 | 9.143811 | 12.15648 | 6.859731 | 6.852877 | 4.042919 |
| HPGD5        | NC_019463 | 30220444..30246506               | <a href="#">101116145</a> | -2.03032 | -4.08497 | 0.000434 | 0.036443 | 0.285899 | 0.271873 | 0.195711 | 0.376486 | 0.544577 | 2.046897 |
| RBPM52       | NC_019464 | 42382789..42424722               | <a href="#">101122793</a> | -1.20486 | -2.30515 | 0.000439 | 0.036669 | 0.542491 | 0.768946 | 0.459334 | 1.150514 | 1.657225 | 1.167723 |
| GNG4         | NC_019482 | complement(8289317..8357374)     | <a href="#">101114927</a> | 0.926109 | 1.900144 | 0.000439 | 0.036669 | 51.58368 | 39.4848  | 93.90423 | 28.53975 | 36.08663 | 29.83031 |
| SPDYA        | NC_019460 | 35534268..35570523               | <a href="#">101123454</a> | -1.9042  | -3.74302 | 0.000441 | 0.036699 | 0.135067 | 0.3056   | 0.053138 | 0.486275 | 0.505676 | 0.799352 |
| SYT1         | NC_019460 | 114742194..115237316             | <a href="#">101102712</a> | -2.65561 | -6.30113 | 0.000451 | 0.036699 | 0.056645 | 0.080799 | 0.04847  | 0.049951 | 0.515881 | 0.582741 |
| SYNE2        | NC_019464 | 72944183..73267530               | <a href="#">101108755</a> | -1.08807 | -2.12589 | 0.000446 | 0.036699 | 6.532024 | 9.854788 | 4.832796 | 10.43991 | 11.52611 | 21.92423 |
| NSRP1        | NC_019468 | 20828779..20871165               | <a href="#">101115561</a> | -0.96662 | -1.95426 | 0.000449 | 0.036699 | 11.07428 | 17.47394 | 7.17087  | 21.99455 | 18.27536 | 27.74464 |
| ATP5G1       | NC_019468 | complement(37125809..37128499)   | <a href="#">443410</a>    | 0.798645 | 1.739466 | 0.000449 | 0.036699 | 31.59354 | 26.86929 | 47.09979 | 23.06424 | 20.41477 | 15.48347 |
| SLC2A5       | NC_019469 | 42437997..42465480               | <a href="#">443507</a>    | -1.97853 | -3.9409  | 0.000445 | 0.036699 | 0.089723 | 0.127982 | 0.272977 | 0.316479 | 0.747705 | 0.817978 |
| MBOAT7       | NC_019471 | 60146607..60164652               | <a href="#">101107304</a> | 0.725004 | 1.652905 | 0.000445 | 0.036699 | 27.5506  | 30.88562 | 47.99231 | 19.51429 | 22.26317 | 20.80771 |
| LY6G6D       | NC_019477 | complement(26643312..26645207)   | <a href="#">101119341</a> | 1.092064 | 2.131788 | 0.000451 | 0.036699 | 305.4263 | 220.1353 | 602.8226 | 213.7499 | 197.0688 | 103.0718 |
| P4HA1        | NC_019482 | complement(28841341..28936893)   | <a href="#">101116374</a> | -0.76857 | -1.70358 | 0.000444 | 0.036699 | 6.995322 | 6.806103 | 4.784919 | 8.71981  | 9.978018 | 12.05377 |
| LOC101115634 | NC_019468 | 40898198..40899119               | <a href="#">101115634</a> | 1.316145 | 2.49     | 0.000453 | 0.036755 | 1052.914 | 1210.599 | 948.0492 | 501.7667 | 637.4781 | 125.7784 |
| SYTL2        | NC_019478 | 9144837..9268661                 | <a href="#">101103681</a> | -0.76906 | -1.70416 | 0.000456 | 0.036922 | 3.606951 | 5.239577 | 3.018095 | 7.222955 | 6.368691 | 6.127315 |
| IFT74        | NC_019459 | 94644224..94757000               | <a href="#">101110029</a> | -0.87129 | -1.8293  | 0.000462 | 0.0372   | 1.388603 | 2.13461  | 1.4361   | 2.497617 | 2.634524 | 3.687781 |
| SLMAP        | NC_019476 | complement(43338987..43496457)   | <a href="#">101123588</a> | -0.69876 | -1.62311 | 0.000462 | 0.0372   | 7.624092 | 9.207122 | 6.509897 | 11.36794 | 12.66788 | 12.85727 |
| NBN          | NC_019466 | 86231878..86286945               | <a href="#">101115286</a> | -0.96506 | -1.95215 | 0.000468 | 0.037575 | 4.836513 | 8.209617 | 3.323074 | 9.030263 | 9.373737 | 12.76669 |
| BST-2A       | NC_019462 | 5441157..5449951                 | <a href="#">100422799</a> | 1.781027 | 3.436708 | 0.000471 | 0.037642 | 3.446672 | 0.915032 | 2.319707 | 0.506236 | 1.087291 | 0.305555 |
| CHD1         | NC_019462 | complement(95292016..95363422)   | <a href="#">101111801</a> | -0.97406 | -1.96436 | 0.00049  | 0.038614 | 6.095949 | 10.00123 | 3.742948 | 11.89745 | 11.0111  | 15.12157 |
| HMGCR        | NC_019464 | 6519416..6540790                 | <a href="#">101108919</a> | 0.758713 | 1.69198  | 0.000491 | 0.038614 | 100.5913 | 92.33684 | 113.6624 | 54.44195 | 54.36686 | 66.92344 |
| LOC101114537 | NC_019468 | complement(40877006..40878061)   | <a href="#">101114537</a> | 1.414584 | 2.665828 | 0.000487 | 0.038614 | 51.25544 | 53.1808  | 67.77516 | 31.4088  | 27.38054 | 4.335221 |
| LOC101116068 | NC_019468 | 40915453..40917620               | <a href="#">101116068</a> | 1.297274 | 2.457641 | 0.00049  | 0.038614 | 285.8715 | 321.5383 | 310.8699 | 130.5323 | 198.6501 | 37.4426  |
| PIK3C2A      | NC_019472 | 34787560..34912953               | <a href="#">101114899</a> | -1.23782 | -2.35842 | 0.000488 | 0.038614 | 1.87559  | 4.659501 | 1.093386 | 5.231527 | 5.108566 | 7.282359 |
| DCLRE1A      | NC_019479 | complement(33197599..33221820)   | <a href="#">101123252</a> | -0.9431  | -1.92266 | 0.000489 | 0.038614 | 2.179756 | 3.618001 | 1.689449 | 5.601869 | 4.086771 | 4.350191 |
| BRWD1        | NC_019458 | complement(257197464..257312852) | <a href="#">101117901</a> | -0.97653 | -1.96773 | 0.000498 | 0.039055 | 1.350546 | 2.223556 | 0.86009  | 2.447003 | 2.443876 | 3.618497 |
| GLS          | NC_019459 | 192096683..192167498             | <a href="#">101122583</a> | -1.02099 | -2.02931 | 0.000501 | 0.039222 | 0.827191 | 1.2451   | 0.467964 | 1.56848  | 1.545697 | 1.912729 |
| LOC101122689 | NC_019461 | 82563982..82597586               | <a href="#">101122689</a> | 1.025332 | 2.035428 | 0.000505 | 0.03939  | 5.820338 | 4.411526 | 3.579564 | 2.187053 | 2.874539 | 1.570748 |
| ZNF654       | NC_019458 | 154490640..154552634             | <a href="#">101102449</a> | -1.0828  | -2.11814 | 0.000526 | 0.039425 | 0.526658 | 1.035968 | 0.40704  | 1.130579 | 1.296436 | 1.645449 |
| ADRA1A       | NC_019459 | 38670865..38783309               | <a href="#">100169940</a> | -1.35196 | -2.55259 | 0.000525 | 0.039425 | 0.358126 | 0.354178 | 0.177055 | 0.471597 | 0.746957 | 0.984864 |
| CWC22        | NC_019459 | 128927606..128994278             | <a href="#">101121571</a> | -0.95146 | -1.93383 | 0.000526 | 0.039425 | 1.993197 | 3.099884 | 1.574575 | 4.266179 | 3.335701 | 4.943664 |
| ZNF638       | NC_019460 | 92957494..93093462               | <a href="#">101108732</a> | -1.1569  | -2.22978 | 0.000509 | 0.039425 | 6.569189 | 13.85001 | 4.412625 | 15.85499 | 14.21928 | 24.01105 |
| RAD50        | NC_019462 | complement(19252566..19387745)   | <a href="#">101123035</a> | -1.04081 | -2.05738 | 0.000508 | 0.039425 | 2.90435  | 4.789466 | 1.713373 | 5.510338 | 5.046413 | 8.306577 |
| SQLF         | NC_019466 | complement(27905527..27927180)   | <a href="#">100125351</a> | 0.691732 | 1.615222 | 0.000517 | 0.039425 | 92.60392 | 68.3367  | 93.59956 | 46.79514 | 55.13923 | 51.02637 |
| RCBTB1       | NC_019467 | complement(19400817..19454389)   | <a href="#">101116583</a> | 0.681584 | 1.6039   | 0.000518 | 0.039425 | 5.845129 | 5.938894 | 5.366313 | 3.146892 | 3.141095 | 4.07994  |
| ITGBL1       | NC_019467 | 77266839..77400676               | <a href="#">101112990</a> | -0.84773 | -1.79966 | 0.000511 | 0.039425 | 2.723381 | 3.42376  | 1.935373 | 5.515368 | 3.808164 | 4.818145 |
| KRT36        | NC_019468 | complement(41124768..41128793)   | <a href="#">101117175</a> | 0.799185 | 1.740118 | 0.000521 | 0.039425 | 37.99463 | 40.98636 | 61.96704 | 34.51684 | 26.15709 | 18.08735 |
| MYBPC2       | NC_019471 | 55508132..55533426               | <a href="#">101111044</a> | -1.50977 | -2.84765 | 0.00052  | 0.039425 | 0.202086 | 0.453852 | 0.363012 | 0.825042 | 0.687961 | 1.286012 |

|              |           |                                  |                           |          |          |          |          |          |          |          |          |          |          |
|--------------|-----------|----------------------------------|---------------------------|----------|----------|----------|----------|----------|----------|----------|----------|----------|----------|
| CLGN         | NC_019474 | 16944599..16989922               | <a href="#">101115069</a> | -1.61402 | -3.06103 | 0.000524 | 0.039425 | 0.377013 | 0.420866 | 0.168315 | 0.474112 | 1.328928 | 1.085831 |
| MPHOSPH9     | NC_019474 | 51897489..51956585               | <a href="#">101118475</a> | -0.97042 | -1.95942 | 0.00052  | 0.039425 | 1.424467 | 2.12471  | 0.933527 | 2.807412 | 2.33252  | 3.409983 |
| MIPOL1       | NC_019475 | 46262248..46572666               | <a href="#">101121886</a> | -1.56488 | -2.95853 | 0.000521 | 0.039425 | 0.110758 | 0.243299 | 0.080874 | 0.368796 | 0.427215 | 0.451327 |
| CDH19        | NC_019480 | 10267958..10347258               | <a href="#">101113295</a> | -1.02382 | -2.0333  | 0.000517 | 0.039425 | 0.64775  | 0.625906 | 0.533409 | 0.998675 | 1.238801 | 1.318603 |
| LOC101117055 | NC_019484 | complement(2068580..2091239)     | <a href="#">101117055</a> | -0.89296 | -1.85698 | 0.000519 | 0.039425 | 8.5494   | 9.806631 | 4.966708 | 13.13271 | 11.73519 | 17.21639 |
| LOC105604204 | NC_019479 | 1060093..1061183                 | <a href="#">105604204</a> | -1.89764 | -3.72603 | 0.000528 | 0.039448 | 0.364323 | 0.683781 | 0.175015 | 1.379757 | 1.616191 | 1.347168 |
| HAP1         | NC_019468 | complement(41365627..41376261)   | <a href="#">101108406</a> | -1.30268 | -2.46687 | 0.000533 | 0.039536 | 0.591778 | 0.986497 | 0.500272 | 2.655726 | 1.018563 | 1.313127 |
| LOC105601907 | NC_019471 | complement(57665511..57935993)   | <a href="#">105601907</a> | -1.17485 | -2.2577  | 0.000532 | 0.039536 | 0.249248 | 0.452492 | 0.213708 | 0.609556 | 0.574034 | 0.823263 |
| ILSRA        | NC_019476 | 23093898..23134747               | <a href="#">101111837</a> | -1.69211 | -3.23128 | 0.000532 | 0.039536 | 0.169066 | 0.085745 | 0.077156 | 0.286245 | 0.343504 | 0.426102 |
| CD200        | NC_019458 | 175281088..175322456             | <a href="#">101120715</a> | 0.834456 | 1.783185 | 0.00054  | 0.039789 | 5.583884 | 6.156745 | 5.358331 | 3.076222 | 3.006117 | 3.180685 |
| CEP290       | NC_019460 | complement(124072063..124163568) | <a href="#">101109526</a> | -1.12358 | -2.17887 | 0.000539 | 0.039789 | 1.918747 | 3.77539  | 1.472995 | 4.197564 | 3.59891  | 7.418031 |
| SFRP4        | NC_019461 | complement(49700370..49710532)   | <a href="#">101107858</a> | -2.15028 | -4.43914 | 0.000543 | 0.039964 | 0.312227 | 0.314373 | 0.39813  | 3.23914  | 0.918325 | 0.276505 |
| SERHL2       | NC_019460 | 217199128..217219992             | <a href="#">101106160</a> | 0.827181 | 1.774216 | 0.000546 | 0.04006  | 6.831127 | 7.730956 | 8.218443 | 4.018926 | 3.710598 | 4.675066 |
| IGFBP4       | NC_019468 | 40200887..40211101               | <a href="#">443470</a>    | 0.717624 | 1.644471 | 0.000547 | 0.04006  | 57.63069 | 45.05654 | 60.73306 | 28.05641 | 39.25096 | 29.40358 |
| DTWD1        | NC_019464 | complement(57612456..57652122)   | <a href="#">101108491</a> | -0.99618 | -1.99471 | 0.00055  | 0.04013  | 0.57896  | 0.820037 | 0.479761 | 1.028956 | 1.448143 | 1.174401 |
| CWF19L2      | NC_019472 | 15517979..15673564               | <a href="#">101103667</a> | -1.0068  | -2.00944 | 0.000552 | 0.040197 | 3.303559 | 6.242339 | 2.480214 | 7.373251 | 6.936746 | 9.275321 |
| CREB1        | NC_019459 | 208576933..208633135             | <a href="#">443118</a>    | -0.95048 | -1.93252 | 0.00057  | 0.041321 | 2.054795 | 2.998118 | 1.302926 | 3.638347 | 3.14012  | 5.172263 |
| CASP14       | NC_019462 | complement(7856497..7865023)     | <a href="#">101120827</a> | -0.91873 | -1.89045 | 0.000571 | 0.041321 | 20.40472 | 16.23071 | 16.31059 | 33.08645 | 18.24775 | 45.26972 |
| AHCTF1       | NC_019469 | 28490710..28583117               | <a href="#">101114886</a> | -0.93294 | -1.90916 | 0.000572 | 0.041321 | 1.981126 | 3.613925 | 1.471508 | 3.696956 | 4.235625 | 5.249275 |
| JAK2         | NC_019459 | 72812001..72927328               | <a href="#">101113909</a> | -0.94558 | -1.92596 | 0.000592 | 0.042646 | 4.571208 | 7.399139 | 3.200231 | 8.72886  | 8.019022 | 11.72812 |
| PIBF1        | NC_019467 | 47946975..48174554               | <a href="#">101123131</a> | -1.37031 | -2.58527 | 0.000593 | 0.042647 | 0.697902 | 1.489124 | 0.51328  | 2.213485 | 1.722116 | 2.853947 |
| SLCO4C1      | NC_019462 | complement(98474880..98565923)   | <a href="#">101104490</a> | -1.64191 | -3.1208  | 0.0006   | 0.042664 | 0.08688  | 0.153839 | 0.061524 | 0.249386 | 0.299589 | 0.348794 |
| ANKRD6       | NC_019465 | complement(47648884..47832575)   | <a href="#">101109885</a> | -0.94619 | -1.92678 | 0.000599 | 0.042664 | 0.464776 | 0.503662 | 0.489045 | 0.90601  | 0.755476 | 1.049995 |
| AARD         | NC_019466 | complement(60074300..60080185)   | <a href="#">101120843</a> | 2.867811 | 7.299567 | 0.000596 | 0.042664 | 0.752969 | 0.19094  | 0.209995 | 0        | 0.11952  | 0.033588 |
| PDLIM3       | NC_019483 | complement(14429636..14458861)   | <a href="#">101113652</a> | -0.83204 | -1.7802  | 0.000599 | 0.042664 | 5.401271 | 4.996891 | 5.568697 | 7.600018 | 12.91965 | 7.245274 |
| TMF1         | NC_019476 | 32492363..32526717               | <a href="#">101116869</a> | -0.86753 | -1.82454 | 0.000611 | 0.043367 | 3.518209 | 5.437234 | 2.524711 | 7.178405 | 5.620967 | 7.606096 |
| TLCD1        | NC_019468 | complement(19739970..19741303)   | <a href="#">101120761</a> | 0.845097 | 1.796386 | 0.000614 | 0.043465 | 20.22636 | 20.74391 | 31.88705 | 16.16533 | 10.69714 | 12.45922 |
| BDP1         | NC_019473 | complement(9995641..10078636)    | <a href="#">101117279</a> | -1.06229 | -2.08825 | 0.000618 | 0.043629 | 4.636274 | 8.305598 | 2.798985 | 9.270875 | 8.543741 | 14.25461 |
| STAG2        | NC_019484 | 102120089..102248891             | <a href="#">101116633</a> | -0.98556 | -1.98008 | 0.000628 | 0.044219 | 11.96727 | 18.70454 | 6.804648 | 21.30751 | 23.49587 | 27.67993 |
| RPAP3        | NC_019460 | 138506362..138540448             | <a href="#">101110665</a> | -0.89488 | -1.85945 | 0.000633 | 0.044504 | 3.714475 | 6.316378 | 3.503805 | 7.552221 | 7.106173 | 9.843921 |
| RLF          | NC_019458 | 14498322..14583180               | <a href="#">101121469</a> | -0.84784 | -1.7998  | 0.000637 | 0.044626 | 3.765022 | 5.347836 | 2.522535 | 6.785554 | 6.058284 | 7.55994  |
| LOC101118574 | NC_019478 | complement(47524510..47525448)   | <a href="#">101118574</a> | -2.22086 | -4.6617  | 0.000645 | 0.044967 | 0.203144 | 0.096589 | 0.212455 | 0.692659 | 0.798075 | 0.90051  |
| PTEN         | NC_019479 | 9230176..9331523                 | <a href="#">101119351</a> | -0.81577 | -1.76024 | 0.000643 | 0.044967 | 6.907383 | 9.286893 | 4.701818 | 10.87835 | 10.29486 | 14.63155 |
| PRKCI        | NC_019458 | complement(214981545..215051409) | <a href="#">101118322</a> | -0.81184 | -1.75545 | 0.00065  | 0.045207 | 6.387093 | 8.477239 | 4.002054 | 9.291107 | 11.58864 | 11.44295 |
| UFL1         | NC_019465 | complement(40276240..40343771)   | <a href="#">101106268</a> | -0.86505 | -1.82141 | 0.000651 | 0.045207 | 4.473396 | 6.706226 | 3.114286 | 7.832345 | 7.562612 | 9.972831 |
| PHOSPHO2     | NC_019459 | complement(138737714..138743344) | <a href="#">101119113</a> | -0.89561 | -1.8604  | 0.000665 | 0.045944 | 5.677966 | 6.098912 | 4.156961 | 6.843481 | 12.10154 | 9.955585 |
| KIAA1033     | NC_019460 | 173505129..173563236             | <a href="#">101114433</a> | -0.97467 | -1.96519 | 0.000664 | 0.045944 | 2.702629 | 4.513888 | 1.683603 | 4.812404 | 5.464879 | 6.801564 |
| PM20D2       | NC_019465 | complement(48049475..48066814)   | <a href="#">101111105</a> | -1.08073 | -2.11511 | 0.000667 | 0.045976 | 0.628656 | 0.792635 | 0.416255 | 1.168115 | 1.094548 | 1.504167 |
| ATP13A5      | NC_019458 | 192134764..192252365             | <a href="#">101107321</a> | -1.54791 | -2.92393 | 0.000674 | 0.046316 | 0.139148 | 0.174853 | 0.226793 | 0.387976 | 0.638953 | 0.508756 |
| IQCB1        | NC_019458 | complement(184364855..184405924) | <a href="#">101110893</a> | -0.91767 | -1.88906 | 0.000684 | 0.04692  | 2.80749  | 2.635042 | 1.71045  | 4.586966 | 3.489351 | 5.021298 |
| FAM171B      | NC_019459 | complement(121473424..121555430) | <a href="#">101116019</a> | -0.90816 | -1.87665 | 0.000689 | 0.047019 | 1.277448 | 1.984389 | 1.038058 | 1.88546  | 2.962277 | 3.029016 |
| PDS5A        | NC_019463 | complement(58786702..58908657)   | <a href="#">101114956</a> | -0.82161 | -1.76738 | 0.000688 | 0.047019 | 7.960882 | 11.40368 | 6.079583 | 13.5966  | 12.92754 | 17.28088 |

|          |           |                                  |                           |          |          |          |          |          |          |          |          |          |          |
|----------|-----------|----------------------------------|---------------------------|----------|----------|----------|----------|----------|----------|----------|----------|----------|----------|
| SLC35A3  | NC_019458 | 76426736..76469420               | <a href="#">101111921</a> | -0.8359  | -1.78497 | 0.000691 | 0.047042 | 2.213309 | 2.993379 | 1.587258 | 3.499491 | 3.67049  | 4.633263 |
| CH13L1   | NC_019469 | complement(352222..365563)       | <a href="#">443279</a>    | 0.702419 | 1.627231 | 0.000697 | 0.047329 | 25.88241 | 18.31032 | 26.87388 | 16.2727  | 12.58395 | 13.4573  |
| SLC22A31 | NC_019471 | complement(13755718..13760962)   | <a href="#">101109903</a> | 1.178024 | 2.262666 | 0.0007   | 0.047444 | 1.900698 | 2.491031 | 3.706876 | 1.329395 | 1.12558  | 1.027207 |
| ZMYM1    | NC_019458 | 9846238..9874293                 | <a href="#">101108698</a> | -1.03933 | -2.05528 | 0.000712 | 0.047793 | 1.280101 | 2.855159 | 1.063399 | 3.394233 | 2.85225  | 4.190074 |
| FAM135A  | NC_019466 | complement(3641869..3802085)     | <a href="#">101108058</a> | -0.71028 | -1.63613 | 0.000712 | 0.047793 | 3.672262 | 4.570022 | 2.705474 | 5.968457 | 5.246153 | 6.216082 |
| MEIS3    | NC_019471 | complement(53328078..53338975)   | <a href="#">101118811</a> | 0.825664 | 1.772351 | 0.000709 | 0.047793 | 6.568276 | 8.093961 | 8.336302 | 4.688454 | 3.789437 | 4.115355 |
| SLC4A7   | NC_019476 | complement(1657846..1751785)     | <a href="#">101102429</a> | -0.70326 | -1.62818 | 0.000708 | 0.047793 | 1.861885 | 2.351689 | 1.88285  | 3.077021 | 3.475964 | 3.103635 |
| DSC1     | NC_019480 | 26209584..26245539               | <a href="#">101115748</a> | -0.88781 | -1.85036 | 0.000727 | 0.04871  | 48.15889 | 72.09196 | 40.07024 | 106.1051 | 80.70963 | 102.2171 |
| ODF2L    | NC_019458 | complement(62743115..62780496)   | <a href="#">101114828</a> | -1.22892 | -2.34392 | 0.000732 | 0.048795 | 0.659491 | 1.643527 | 0.536207 | 1.946524 | 1.884283 | 2.666661 |
| MPDZ     | NC_019459 | complement(81070699..81238226)   | <a href="#">101120218</a> | -0.78095 | -1.71827 | 0.000734 | 0.048795 | 1.68014  | 2.179141 | 1.20688  | 2.202356 | 3.107528 | 3.17936  |
| SYNE1    | NC_019465 | complement(75665861..76158875)   | <a href="#">101106269</a> | -0.81395 | -1.75802 | 0.000731 | 0.048795 | 1.518716 | 2.074461 | 0.984152 | 2.183494 | 2.417034 | 3.23911  |
| HSD17B14 | NC_019471 | complement(54343584..54362364)   | <a href="#">101123575</a> | 0.922387 | 1.895249 | 0.000736 | 0.048859 | 13.25603 | 10.89643 | 18.60584 | 8.955273 | 6.151987 | 6.765081 |
| GOLGB1   | NC_019458 | complement(184271100..184347245) | <a href="#">101110468</a> | -1.01417 | -2.01974 | 0.000741 | 0.049021 | 6.599495 | 11.46783 | 4.644094 | 13.05186 | 11.12825 | 20.51229 |
| LTN1     | NC_019458 | 125198163..125255736             | <a href="#">101109928</a> | -0.94584 | -1.92631 | 0.000745 | 0.04921  | 3.289111 | 4.662471 | 1.806364 | 5.292052 | 5.676485 | 7.358956 |
| SLITRK6  | NC_019467 | complement(61179847..61186544)   | <a href="#">101105831</a> | -1.33188 | -2.5173  | 0.00075  | 0.049382 | 1.022357 | 1.970531 | 0.438974 | 2.347216 | 2.067773 | 4.008807 |
| CD24     | NC_019465 | 30086266..30090226               | <a href="#">101119731</a> | -0.69002 | -1.61331 | 0.000752 | 0.049397 | 37.97428 | 51.11952 | 39.02748 | 64.31847 | 71.24079 | 65.91766 |
| CARNMT1  | NC_019459 | 61309512..61348644               | <a href="#">101122760</a> | -0.80444 | -1.74646 | 0.000756 | 0.049491 | 2.697171 | 3.853286 | 2.325979 | 4.627299 | 5.240042 | 5.227728 |
| BRWD3    | NC_019484 | complement(67823466..67987104)   | <a href="#">101120385</a> | -0.77893 | -1.71586 | 0.000756 | 0.049491 | 2.125818 | 3.261036 | 1.740264 | 3.494403 | 3.860316 | 4.569786 |
| PRRG4    | NC_019472 | 61598804..61617301               | <a href="#">101122380</a> | -0.71094 | -1.63687 | 0.000765 | 0.049944 | 5.316812 | 7.310165 | 5.105111 | 9.142494 | 8.283065 | 10.79914 |

Table S3: qPCR primers list

| Target gene  | Forward primer(5'-3') | Reverse primer(5'-3') | Annealing temp. (°C) | Product size (bp) | Accession number |
|--------------|-----------------------|-----------------------|----------------------|-------------------|------------------|
| GAPDH        | GCGGTGAACCACGAGAAGTA  | GCGGTGGACAGTGGTCATAA  | 64                   | 141               | NM_001190390     |
| CD200        | CCTTGAAGATGAGGCGTGT   | ACAAAGAGAGTGAGGCAGGC  | 64                   | 88                | XM_012190412     |
| CD24         | TCCTCCAGACTACCTCACC   | AGAGACTGGCTGTGACTGC   | 64                   | 88                | XM_004011234     |
| FOXI3        | CAGCTTCCCTTCTACCAGC   | TGAAGCAGTCGTTGAGGGAC  | 64                   | 80                | XM_012175964     |
| TGFB1        | GAGCCCTGGACCAACTAC    | GTAGCCCTGGGTTCTGTGAA  | 64                   | 119               | NM_001009400     |
| RPTN         | AAAGGCCACCCTGTCACAAA  | GTGGCTCTGCTTCTCACCAT  | 64                   | 104               | XM_012181345     |
| LOC101116068 | TTGCCCTCCAATTGCTATC   | CCCACTGAAGGTTTGTCCAC  | 64                   | 133               | XM_012186088     |
| KRT1         | GATCTCGGCTGGATTCAAG   | TCTTGATGCCACAACTCA    | 60                   | 120               | XM_015094647     |
| KRT10        | TCGCTATTGTGTGCAGCTCT  | TGTTGGTACTCGGCATTCTG  | 64                   | 108               | XM_015098774     |
| FABP4        | AATTGGGCCAGGAATTTGAT  | GGTGGTTGATTTCCCATCC   | 60                   | 116               | NM_001114667     |
| ELOVL3       | CTTCGGGACAGTGAGGATGT  | CAGGAAGGACCAGAATTGGA  | 62                   | 121               | XM_012102841     |
